# Supplementary material
Source: publisher figshare collection journal article supplement (https://gsajournals.figshare.com/ndownloader/files/29003343)
Supplement: Supplementary file 1 [file 29003343]

## Sheet: Table S3
Table S3. Sample information including IDs, run information, inclusion in final analysis, biomass measurements, sample weight, and raw ionomics data
pot_id	geno_id	sample_id	accession_id	population number	ECw	Replicate(flood tray)	ICP run	WR run	Included in final analysis	total_Weight	change in total weight between 2.5dS/m and 30dS/m	Sample_weight	B11	Na23	Mg26	P31	S34	K39	Ca44	Fe54	Mn55	Co59	Ni60	Cu63	Zn66	As75	Se78	Rb85	Sr88	Mo98	Cd111
2004	fine_13	2004_1	PI 576134	2	2.5	1	5	8	TRUE	217.1	-0.809304	91.7	10.5688	1495.66	3965.46	2711.35	12857.2	41928.3	4919.15	67.5557	330.63	1.62814	0.797494	10.4154	58.1578	1.45441	0.884544	52.9642	97.7446	13.8651	0.120538
2004	fine_13	2004_3	PI 576134	2	20	1	6	9	TRUE	75.1	-0.809304	75.1	7.33343	7724.35	1545.5	2347.73	10730.9	27916.8	3566.02	66.256	419.02	1.48773	1.00431	13.902	98.3632	0.346381	0.444389	40.4262	38.4246	9.84692	0.0933921
2004	fine_13	2004_5	PI 576134	2	40	1	13	19	FALSE	27	-0.809304	27	14.4374	10848.3	2084.55	2451.71	8275.67	25391.7	2918.84	91.0672	592.836	2.99937	0.789849	17.4112	115.115	0.435815	0.460486	39.2505	43.6952	11.8801	0.0984774
2006	fine_07	2006_1	DG018	1	2.5	1	4	7	TRUE	78.2	-0.913043	78.2	10.8604	1696.96	4512.49	3007.85	13418.1	41320.2	4893.54	67.625	373.193	2.16407	1.07809	10.7669	48.9544	0.848113	1.12457	62.0605	103.82	16.9426	0.0665969
2006	fine_07	2006_4	DG018	1	30	1	3	5	FALSE	6.8	-0.913043	6.8	12.607	9614.22	2649.27	3074.86	-6213.05	36516.3	4170.81	67.1547	673.617	2.00234	-4.91694	28.5572	122.58	0.817599	-0.614582	52.087	64.3	13.4367	0.120587
2006	fine_07	2006_5	DG018	1	40	1	13	20	FALSE	2.5	-0.913043	2.5	19.0965	47963.3	6175.17	3958.01	19349	24396.1	13446.5	288.025	1457.49	4.44286	-0.940803	34.7583	188.471	3.1045	0.818781	67.7872	237.627	17.9821	0.401354
2008	fine_02	2008_1	PI 509021	2	2.5	1	1	1	TRUE	94.7	1.51848	94.7	5.13833	633.987	3335.43	2144.19	8165.87	40905.3	3140.1	80.7783	256.412	0.874903	0.798754	7.4929	42.5354	0.729696	0.37568	52.0126	64.1024	8.17645	0.0472114
2008	fine_02	2008_2	PI 509021	2	10	1	1	2	TRUE	198.3	1.51848	84.2	5.53182	4990.5	1825.99	1512.51	6329.05	24831.8	2417.34	67.4067	251.366	0.548875	0.543176	6.75596	34.3002	0.501315	0.404731	33.0584	41.2207	6.72309	0.0521412
2008	fine_02	2008_3	PI 509021	2	20	1	6	9	TRUE	302	1.51848	74.3	9.71581	7608.7	2818.38	2038.58	9755.18	32683.2	4279.96	69.4919	505.313	1.40473	0.751986	9.89796	74.6097	0.6005	0.343669	46.283	67.5474	11.6311	0.0748174
2008	fine_02	2008_4	PI 509021	2	30	1	3	5	FALSE	238.5	1.51848	82.9	3.55598	8576.32	2197	2450.36	8403.73	33720.8	2342.95	53.6698	347.572	2.29942	0.121094	11.7174	93.6515	0.268506	0.0471321	47.9324	30.4341	13.4264	0.0389465
2008	fine_02	2008_5	PI 509021	2	40	1	13	19	FALSE	22.2	1.51848	22.2	25.9983	9839.04	2072.74	3065.79	8481.75	37286.6	2930.07	83.2043	560.011	3.24634	0.926095	16.797	144.759	0.225289	0.374539	52.0129	25.9871	20.327	0.0613327
2019	fine_11	2019_1	PI 377709	2	2.5	1	4	7	TRUE	133.1	NA	95.3	5.07564	707.543	3024.75	3222.05	8865.34	49822.6	3454.36	200.723	196.767	0.834726	0.821168	8.61519	56.5539	0.841628	0.52281	59.4541	60.7448	7.29259	0.0275525
2019	fine_11	2019_3	PI 377709	2	20	1	2	4	TRUE	206.4	NA	98.6	5.81717	9945.54	1362.47	2319.14	15011.7	31169.2	2568.58	80.8581	279.827	0.781647	0.790417	9.78844	66.3435	0.292726	0.42827	36.3103	26.7456	11.4363	0.0466458
2039	fine_01	2039_2	PI 647899	2	10	1	1	2	TRUE	317.2	NA	118.4	3.80016	5735.47	1874.43	1980.18	6654.74	31600.8	1738.12	41.1374	168.732	0.425799	0.416818	5.66273	51.3182	0.407402	0.265841	28.0658	23.1321	5.49307	0.0253798
2039	fine_01	2039_3	PI 647899	2	20	1	6	9	TRUE	124.7	NA	84.5	5.96034	8714.35	1887.74	2522.14	11503.5	29589.3	5686.5	59.7119	475.478	0.797364	0.755936	15.411	173.216	0.219377	0.283744	28.4042	20.0978	11.6543	0.0640822
2039	fine_01	2039_4	PI 647899	2	30	1	9	13	FALSE	143.9	NA	72.2	5.13315	17797.6	1386.47	2383.29	9754.5	24578.1	2375.77	84.2262	489.604	1.36231	0.680927	18.6697	179.385	0.193195	0.230953	24.4292	16.0808	15.9923	0.070494
2039	fine_01	2039_5	PI 647899	2	40	1	13	20	FALSE	66.6	NA	66.6	5.41914	26863.4	1371.95	2318.75	8513.3	25544.2	2414.41	68.5471	553.001	1.57797	0.648625	14.6281	165.487	0.184601	0.187322	24.1728	20.1055	14.121	0.0800489
2042	fine_20	2042_1	DG020	1	2.5	1	3	5	TRUE	32.7	-0.697248	32.7	9.16099	1925.71	4758.81	3416.65	9649.04	43831.5	4806.04	76.6219	423.282	3.48715	1.00728	13.5581	73.0299	0.659341	0.860708	60.8188	86.4998	7.38732	0.0816473
2042	fine_20	2042_2	DG020	1	10	1	2	4	TRUE	48.2	-0.697248	48.2	7.59459	7791.47	3117.29	2657.99	13361	26421.6	3556.23	73.0264	400.148	2.79009	1.42466	13.3653	68.3223	0.351095	0.631129	35.6197	48.1058	4.24947	0.0600277
2042	fine_20	2042_3	DG020	1	20	1	6	9	FALSE	6.7	-0.697248	6.7	17.9769	8807.75	2806.56	2939.34	7138.19	17874.8	56832.8	128.731	496.898	2.21738	1.43421	30.0221	953.132	0.405143	0.393722	23.5011	34.1379	6.26641	0.085323
2042	fine_20	2042_4	DG020	1	30	1	8	12	FALSE	9.9	-0.697248	9.9	11.9226	9127.98	1191.22	2432.64	12386.7	15382.8	3531.21	68.3398	484.136	2.43248	1.5551	25.9627	174.021	0.287873	0.385369	20.6281	16.4882	6.48318	0.0849491
2045	fine_10	2045_1	PI 364836	2	2.5	1	4	7	TRUE	198.8	-0.292254	87.3	5.29984	853.666	3312.3	2879.57	10147.8	54923	2715.36	64.9335	237.912	0.746847	0.633003	9.15981	50.7214	1.08106	0.604626	63.994	54.0285	8.72799	0.0450169
2045	fine_10	2045_3	PI 364836	2	20	1	5	8	TRUE	146.8	-0.292254	92.1	5.26522	7680.69	1595.01	2306.01	8594.98	29517	2151.6	70.7828	313.562	0.693099	0.538169	12.0052	77.1187	0.370836	0.26543	31.1881	24.1603	8.50236	0.0465994
2045	fine_10	2045_4	PI 364836	2	30	1	7	10	FALSE	140.7	-0.292254	73.3	5.02762	10553.1	1680.66	2525.01	9638.81	30112.2	2123.26	117.213	377.24	1.06244	0.636825	15.9138	144.632	0.294908	0.275113	32.035	18.5234	12.5345	0.10453
2047	fine_01	2047_1	PI 647893	2	2.5	1	1	1	TRUE	179	-0.807263	117.1	3.97562	384.462	2780.59	4300.27	4789.46	46127.2	2212.31	33.9662	227.273	0.655725	0.553097	6.39063	48.8126	1.44886	0.419639	50.8271	42.8878	6.15808	0.0331377
2047	fine_01	2047_2	PI 647893	2	10	1	1	2	TRUE	183.2	-0.807263	77.8	3.69942	4373.53	1864.91	1649.56	6344.29	26272.5	1815.24	43.2878	202.05	0.475955	0.495646	5.26616	41.0552	0.43931	0.328542	23.7001	28.4521	5.45467	0.0382866
2047	fine_01	2047_3	PI 647893	2	20	1	2	4	TRUE	93.4	-0.807263	93.4	5.48021	9097.05	2076.12	2758.8	9523.14	32531.5	2825.13	68.3674	398.594	0.887191	0.712571	11.9694	89.4787	0.429436	0.364142	38.7564	32.018	10.1028	0.0582726
2047	fine_01	2047_4	PI 647893	2	30	1	7	10	FALSE	34.5	-0.807263	34.5	4.13991	15951.8	1962.28	2521.58	8813.32	28181.2	3410.34	78.5265	680.868	1.43168	0.881022	20.0942	181.461	0.415554	0.276324	32.3917	30.4181	15.2689	0.121288
2050	fine_01	2050_1	PI 647898	2	2.5	1	2	4	TRUE	88.9	1.02475	88.9	7.02947	1193.36	3393.27	3654.75	5509.58	48210.7	3181.37	1020.74	335.115	1.62203	1.11225	10.7524	70.7609	1.51532	0.772896	58.3144	63.9405	9.47129	0.0876509
2050	fine_01	2050_3	PI 647898	2	20	1	4	7	TRUE	173.5	1.02475	92.8	4.90926	8348.4	1859.84	2334.66	8169.89	31046.8	2869.74	74.7193	409.95	1.14878	0.807099	10.0758	70.5083	0.477881	0.296837	39.4655	41.857	9.71155	0.0503227
2050	fine_01	2050_4	PI 647898	2	30	1	2	4	FALSE	180	1.02475	80.3	5.66235	11435.8	1463.14	3116.98	3976.03	27160.9	2092.41	88.4714	373.195	1.34097	0.752321	13.3087	114.506	0.518353	0.272599	34.7748	24.6711	11.2741	0.0984771
2050	fine_01	2050_5	PI 647898	2	40	1	12	18	FALSE	79.9	1.02475	79.9	8.64285	79236.4	2713.67	3883.79	15099.8	35966.2	6422.04	138.826	1085.68	5.11868	1.6708	27.4974	347.513	0.806979	0.479889	42.9112	71.471	24.2741	0.210269
2055	fine_01	2055_1	PI 647895	2	2.5	1	2	4	TRUE	129.9	-0.30254	78.8	6.03068	763.7	3565.51	2950.73	12099.7	61172.7	2903.22	76.7293	325.365	1.49733	1.11631	9.51735	71.9963	0.860561	0.613621	71.6611	59.1553	8.50543	0.0906442
2055	fine_01	2055_3	PI 647895	2	20	1	2	4	TRUE	139.8	-0.30254	84.7	5.43914	9972.02	1719.67	2772.18	8342.73	31965.5	2493.4	83.8427	342.107	0.788124	0.741152	13.2509	81.5286	0.398094	0.350448	39.1006	27.1603	9.65356	0.0552749
2055	fine_01	2055_4	PI 647895	2	30	1	9	13	FALSE	90.6	-0.30254	90.6	4.78419	15448.1	1076.34	2269.94	7816.17	24473.2	1995.27	84.6079	365.836	0.974367	0.631747	17.5851	124.953	0.189485	0.223811	27.8609	14.3128	12.0363	0.0539912
2055	fine_01	2055_5	PI 647895	2	40	1	12	18	FALSE	52.8	-0.30254	52.8	10.8201	54267.1	2865.31	4221.14	17632.6	44085.5	8304.28	130.617	1068.93	2.45814	1.279	36.7747	473.05	0.557617	0.468411	51.4565	37.1957	29.0308	0.229416
2064	fine_08	2064_1	DG021	3	2.5	1	2	4	TRUE	46.1	-0.904555	46.1	8.84003	914.863	4344.61	3288.85	14260.2	47205.4	3903.22	86.6828	236.73	0.902944	1.1223	12.5012	48.4189	0.727996	0.659063	60.7787	61.0499	8.68998	0.063287
2064	fine_08	2064_2	DG021	3	10	1	1	2	TRUE	41	-0.904555	41	5.7438	5441.96	2350.83	1996	9838.89	17742.1	2622.09	50.7411	198.51	0.541188	0.46982	13.5295	52.0961	0.325282	0.602018	19.1496	26.4139	6.96936	0.0423985
2064	fine_08	2064_3	DG021	3	20	1	2	3	TRUE	47.5	-0.904555	47.5	7.70501	9956.43	2797.75	2596.04	14459.5	24008.4	3404.5	83.1599	320.871	1.47853	1.06088	18.4657	102.405	0.394698	0.505523	26.2401	28.9565	15.4038	0.0757285
2064	fine_08	2064_4	DG021	3	30	1	7	10	FALSE	4.4	-0.904555	4.4	-2.95426	12677.8	7257.75	3932.52	4732.01	31465.5	250442	348.466	756.802	6.22469	3.46409	56.9312	4064.26	0.54801	0.118075	38.0798	71.7323	21.3763	0.214707
2064	fine_08	2064_5	DG021	3	40	1	12	18	FALSE	5.3	-0.904555	5.3	35.1413	28577.5	6581.31	6273.1	36618.9	48689.3	19787.2	140.976	2279.4	6.08204	3.78231	105.801	1115.93	0.577826	0.482511	53.4528	61.8664	73.3035	0.506361
2065	fine_01	2065_1	PI 647912	2	2.5	1	1	1	TRUE	56.6	NA	56.6	4.99231	514.45	3105.68	2224.95	10110.6	39784.8	2440.2	52.1145	543.895	2.49384	1.42353	9.9066	91.9642	0.573995	0.63131	47.8135	48.0732	8.5383	0.111071
2065	fine_01	2065_3	PI 647912	2	20	1	5	8	TRUE	105.5	NA	105.5	4.63216	8814.84	1764.19	2294.1	8324.41	27672.7	2015.77	66.3242	425.87	1.81307	1.09294	13.0614	116.198	0.38683	0.345165	30.1916	24.0237	9.724	0.0788701
2065	fine_01	2065_5	PI 647912	2	40	1	12	18	FALSE	37.8	NA	37.8	8.08142	58107.9	2481.31	4665.37	16370.6	48206.4	5954.5	119.662	815.836	2.67576	1.38045	34.4096	312.052	0.620178	0.507636	57.5841	46.4659	23.1481	0.16631
2067	fine_06	2067_1	DG010	3	2.5	1	2	4	TRUE	27.9	-0.756272	27.9	7.76355	905.676	4064.44	2163.99	31061.4	47650.8	5066.17	89.7379	617.234	1.3264	1.3697	11.8719	72.6367	0.337692	0.967581	54.3472	68.7373	9.4679	0.0660262
2067	fine_06	2067_2	DG010	3	10	1	2	3	TRUE	17	-0.756272	17	6.9301	6867.7	3495.1	2828.85	29365.2	36327	4969.29	102.658	802.073	1.71248	2.84173	18.7783	113.261	0.356521	1.20633	38.1926	44.6017	9.33788	0.124357
2067	fine_06	2067_3	DG010	3	20	1	5	8	FALSE	6.5	-0.756272	6.5	3.14409	9562.91	2483.57	1987.14	1312.87	16508.4	9457.93	82.676	1186.18	2.65872	1.50063	23.6648	265.332	0.371793	-0.207948	20.0046	32.138	10.3667	0.154165
2067	fine_06	2067_4	DG010	3	30	1	6	9	FALSE	6.8	-0.756272	6.8	10.7695	12938.1	3713.79	1913.7	9029.44	17338.5	8438.47	101.734	1786.71	4.19667	1.3474	31.1888	425.199	0.365155	0.412751	20.5001	31.8116	20.1212	0.293116
2067	fine_06	2067_5	DG010	3	40	1	12	18	FALSE	0.3	-0.756272	0.3	252.663	109643	22984.4	30013.9	3003.65	198816	229829	2330.9	7979.5	20.8589	21.4607	213.466	7834.83	3.78094	-5.73422	243.82	245.366	109.563	1.93263
2076	fine_07	2076_1	DG019	1	2.5	1	2	4	TRUE	15.3	-0.79085	15.3	13.695	2079.77	3824.58	2632.96	30196.2	34696	5388.12	99.6998	702.445	2.08932	3.41918	21.2736	55.0755	0.621134	1.76308	42.685	80.9602	9.13213	0.0931299
2076	fine_07	2076_2	DG019	1	10	1	1	2	FALSE	10.3	-0.79085	10.3	12.8559	4561.52	2526.67	2514.99	20106.1	14720.3	3872.48	94.3614	561.522	3.91792	2.8223	17.3545	87.6866	0.629507	2.27312	31.1939	58.0787	7.15601	0.323497
2076	fine_07	2076_3	DG019	1	20	1	4	7	FALSE	4.9	-0.79085	4.9	10.6764	9516.05	2602.37	2990.35	7437.16	29093.6	9145.51	117.823	793.526	4.43036	2.74073	36.0832	206.716	0.977348	0.316663	37.4711	63.184	15.6213	0.0758537
2076	fine_07	2076_4	DG019	1	30	1	8	11	FALSE	3.2	-0.79085	3.2	24.6227	12259.3	1711.57	2297.37	-118.695	22675.5	370.38	77.3063	747.706	5.43286	3.38334	42.8792	135.619	0.501078	0.95744	34.1293	42.8409	11.4462	0.119697
2076	fine_07	2076_5	DG019	1	40	1	12	18	FALSE	1.7	-0.79085	1.7	230.728	35096.3	3414.85	6158.87	15931.6	38307.1	10362.3	264.305	1600.65	6.31577	9.18652	118.782	523.273	1.70968	-0.859013	46.2524	60.2463	32.933	0.386544
2080	fine_05	2080_1	DG004	3	2.5	1	2	4	TRUE	126.1	-0.591594	82.6	7.57428	1036.17	4302.1	3419.16	4695.16	41685.4	3620.5	104.57	515.86	1.24761	0.589541	8.51431	66.5403	1.99313	0.832932	53.1289	70.1581	12.1324	0.133767
2080	fine_05	2080_2	DG004	3	10	1	1	2	TRUE	119.7	-0.591594	119.7	5.05451	4698.48	2146.65	1796.81	5475.45	23158	2686.01	53.7108	330.937	1.19143	0.581059	6.93614	44.1417	0.450864	0.311802	30.5525	46.7625	6.81278	0.0573362
2080	fine_05	2080_3	DG004	3	20	1	3	5	TRUE	70.6	-0.591594	70.6	7.67911	8282.16	2661.09	2072.03	8697.43	26022.6	4467.52	58.855	615.917	2.39786	0.577113	12.949	84.8903	0.683278	0.348035	36.2807	77.3421	9.88931	0.0915578
2080	fine_05	2080_4	DG004	3	30	1	8	12	FALSE	51.5	-0.591594	51.5	10.7232	16930.6	2022.24	1869.56	8739.81	19968.9	3830.12	77.9197	751.931	3.53014	0.767432	15.9632	121.795	0.470796	0.399721	28.9054	45.7186	12.9351	0.106783
2080	fine_05	2080_5	DG004	3	40	1	12	18	FALSE	2	-0.591594	2	84.5648	24907.2	5291.19	6902.46	8479.01	69350.2	11840.1	269.715	2860.84	4.51821	3.79209	54.5392	256.897	1.60344	-0.729718	85.3367	131.134	41.8891	0.308665
2082	fine_07	2082_1	DG015	1	2.5	1	3	6	TRUE	73.4	-0.779292	73.4	6.1971	1741.7	4099.3	2773.61	12076.4	36135.5	4759.57	67.8469	296.358	1.40326	0.464353	11.7024	48.0493	0.668824	0.483041	55.9739	91.2218	9.61793	0.0685326
2082	fine_07	2082_2	DG015	1	10	1	2	3	TRUE	86.3	-0.779292	86.3	7.42551	8783.4	2922.61	3263.57	5177.1	24700.6	4066.18	75.8348	288.475	1.10721	0.736601	12.8479	42.3566	0.638725	0.316261	38.137	65.0579	8.14956	0.0834677
2082	fine_07	2082_3	DG015	1	20	1	5	8	TRUE	56.4	-0.779292	56.4	7.76743	10690.8	3088.3	2462.4	10166	23964.1	5000.62	74.186	388.217	1.32677	0.750797	13.3944	60.7234	0.52022	0.283979	34.8305	69.1814	9.58008	0.0812714
2082	fine_07	2082_4	DG015	1	30	1	2	4	FALSE	16.2	-0.779292	16.2	24.4867	8313.55	2397.9	2715.79	20460.6	25563.7	4539.27	105.839	477.573	1.43148	2.50858	22.1717	91.0491	0.393406	0.969707	40.0854	48.3836	12.8582	0.167971
2082	fine_07	2082_5	DG015	1	40	1	12	18	FALSE	10.5	-0.779292	10.5	20.985	81895.5	4877.58	4463.25	22119.1	34215	12160.3	91.1087	1738.19	2.86335	2.98268	60.6174	258.201	1.27885	0.428291	54.2191	106.783	37.8401	0.409195
2087	fine_03	2087_1	PI 509022	3	2.5	1	1	1	TRUE	88.3	-0.878822	88.3	7.27164	609.231	2884.58	1763.65	8740.64	33347.4	4411.18	62.5111	252.747	0.892337	0.671536	6.04109	32.3549	0.724435	0.529189	49.1405	83.6835	8.47707	0.0654675
2087	fine_03	2087_2	PI 509022	3	10	1	1	2	TRUE	83	-0.878822	83	5.89948	4432.19	1926.22	1986.62	6198.39	21518.9	3404.72	62.1428	291.485	1.38673	0.878259	7.24079	41.4287	0.444356	0.473338	29.5739	52.8111	5.60472	0.0480816
2087	fine_03	2087_3	PI 509022	3	20	1	4	7	FALSE	6	-0.878822	6	4.0578	10108.8	5464.17	2883.84	2859.53	27268.9	9102.58	94.3917	998.685	3.82786	1.3807	14.9281	123.081	1.91213	-0.197978	37.8945	165.543	8.50661	0.171588
2087	fine_03	2087_4	PI 509022	3	30	1	2	4	FALSE	10.7	-0.878822	10.7	10.9149	10902.3	2825.77	2585.13	41635.9	29742.3	8618.88	134.849	492.817	1.79162	3.45852	14.519	93.1228	1.40758	1.85335	45.2833	175.883	14.4701	0.153721
2087	fine_03	2087_5	PI 509022	3	40	1	13	19	FALSE	5.7	-0.878822	5.7	64.63	45078.3	3426.78	2962.92	-704.088	14671.6	18977.4	152.142	970.844	1.82433	1.84297	17.5065	442.763	1.62958	0.706074	46.6857	177.05	22.7052	0.324605
2097	fine_04	2097_1	PI 647891	3	2.5	1	4	7	TRUE	122.6	NA	92	10.6426	1235.49	4102.37	3287.64	11412.5	47410	5182.06	127.86	353.517	1.16493	0.792779	8.96756	65.5926	1.25022	0.924231	60.6648	83.3194	14.7398	0.067113
2097	fine_04	2097_2	PI 647891	3	10	1	1	2	TRUE	250.5	NA	116.4	4.05758	5787.02	3096.53	2065.1	7667.63	32237.8	3798.33	58.88	281.771	1.55441	0.756764	7.14828	61.0364	0.714107	0.341794	30.4363	61.8711	9.06221	0.0788759
2097	fine_04	2097_3	PI 647891	3	20	1	5	8	TRUE	40.4	NA	40.4	7.82732	6959.64	1975.98	2472.45	9944.06	31444.9	3474.65	60.8385	598.814	2.30611	1.02336	19.831	96.7721	0.508167	0.471379	45.6757	44.2914	15.2781	0.101572
2097	fine_04	2097_5	PI 647891	3	40	1	13	20	FALSE	9.3	NA	9.3	9.52101	36025.9	6698.36	2460	16586.9	11634.5	9161.38	64.7275	1065.8	7.07796	1.80812	22.1003	217.991	1.17897	0.512259	42.1872	199.173	28.0589	0.358747
2108	fine_01	2108_3	PI 647902	2	20	1	2	4	TRUE	141.2	NA	75.5	8.17673	8017.21	2673.24	2629.22	10717.2	38193	4023.5	70.5704	457.359	1.59586	1.07171	13.2912	91.7914	0.90231	0.557456	50.2693	71.9228	17.4519	0.112883
2108	fine_01	2108_4	PI 647902	2	30	1	3	6	FALSE	45	NA	45	6.89942	10303.7	4394.94	2857.11	9913.75	35027.7	3820.7	47.0332	828.198	4.2204	-0.661319	17.7205	212.477	0.930973	-0.0454603	47.2539	62.9466	30.474	0.212665
2108	fine_01	2108_5	PI 647902	2	40	1	13	19	FALSE	49.5	NA	49.5	11.8035	38842.9	3642.84	2473.92	13172.6	27552.2	5984.42	50.5322	636.68	3.75583	1.00268	13.2024	164.813	1.6691	0.511004	39.3288	127.277	31.0737	0.144552
2113	fine_06	2113_1	DG009	3	2.5	1	3	6	TRUE	151.4	-0.902246	81.7	6.87179	958.276	2942.32	2214.77	9510.85	41221.7	2796.54	60.4289	280.349	1.84042	0.197594	5.816	45.5713	0.766323	0.570085	57.6669	55.1502	12.5194	0.215099
2113	fine_06	2113_2	DG009	3	10	1	1	2	TRUE	239.1	-0.902246	107.6	4.4113	4102.08	2200.5	1365.44	7224.46	30812.2	2331.49	54.455	206.078	1.74235	0.827397	4.77396	37.4418	0.219096	0.33607	33.9903	41.401	6.73782	0.0701137
2113	fine_06	2113_3	DG009	3	20	1	6	9	TRUE	35.2	-0.902246	35.2	7.81741	4886.03	2266.77	1931.42	9083.54	30231.3	12574	62.948	610.992	4.75657	1.12532	15.807	323.187	0.252895	0.438826	39.5243	41.704	9.42116	0.136933
2113	fine_06	2113_4	DG009	3	30	1	7	10	FALSE	14.8	-0.902246	14.8	8.3978	5915.56	2432.18	2077.72	9625.33	23746.5	4104.15	79.8051	1139.78	4.00219	0.694344	20.3485	158.05	0.38649	0.365479	32.8766	44.7805	17.7267	0.194588
2113	fine_06	2113_5	DG009	3	40	1	13	19	FALSE	11.4	-0.902246	11.4	33.8849	13631.7	3808.39	2395.35	9344.5	31451.8	8568.96	98.9494	1532.71	6.51853	1.08723	19.3124	305.049	0.611041	0.412162	39.6964	74.4143	21.4448	0.402013
2118	fine_06	2118_1	DG011	3	2.5	1	1	1	TRUE	181.6	-0.829295	121.5	3.66404	473.748	3063.37	2094.31	6879.98	40360.9	2949.77	79.8711	278.59	0.984118	0.547241	4.47213	46.0479	0.584912	0.54753	47.5694	54.7876	7.97523	0.0588221
2118	fine_06	2118_2	DG011	3	10	1	1	2	TRUE	237.3	-0.829295	120.3	3.55212	4235.32	2305.59	1529.23	5658.22	23852.4	2651.25	43.1922	247.586	0.776265	0.471324	4.47486	34.5814	0.366005	0.365473	26.8575	45.6286	5.4145	0.0459617
2118	fine_06	2118_3	DG011	3	20	1	6	9	TRUE	74.5	-0.829295	74.5	4.92681	7475.71	2385.08	1843.9	9077.48	26750	3409.21	43.2711	563.49	1.68768	0.761382	11.2725	79.0028	0.39013	0.425492	30.6485	48.5483	8.48534	0.0796754
2118	fine_06	2118_4	DG011	3	30	1	3	5	FALSE	31	-0.829295	31	5.90589	12952.1	2326.22	1899.83	3805.37	24249	3967	59.6298	834.641	2.62569	-1.18107	15.7361	130.014	0.605914	0.183945	28.2917	49.3504	13.1492	0.14552
2118	fine_06	2118_5	DG011	3	40	1	12	18	FALSE	4.8	-0.829295	4.8	22.5426	41261.5	6867.06	5026.09	15468.9	51163.2	45133.3	165.52	2692.01	6.16	3.2154	41.3149	1496.94	1.94385	0.888106	60.613	168.291	38.3893	0.418314
2126	fine_05	2126_1	DG001	3	2.5	1	7	10	TRUE	161.3	-0.654061	81.8	8.41722	899.588	5056.59	2852.8	10265.4	46525	3941.04	75.0314	367.11	0.952652	0.407134	6.89871	60.8496	1.02832	0.528966	59.264	88.6154	11.4153	0.108576
2126	fine_05	2126_3	DG001	3	20	1	7	10	TRUE	37.3	-0.654061	37.3	8.3216	7719.67	2618.47	2146.02	8223.37	25837.1	4134.08	80.2248	685.948	1.5906	0.79288	14.9024	93.3709	0.586136	0.364259	33.5458	57.633	10.0615	0.114892
2126	fine_05	2126_4	DG001	3	30	1	6	9	FALSE	55.8	-0.654061	55.8	7.97635	11675.8	2474.01	1911.87	10046.1	20231.3	4674.14	77.0889	609.699	2.12921	0.690692	13.6856	118.445	0.611602	0.340169	29.1807	58.5782	12.6531	0.114103
2126	fine_05	2126_5	DG001	3	40	1	12	18	FALSE	0.7	-0.654061	0.7	87.3968	32402.5	10574.1	12401.5	88869.9	99250	270491	667.772	3052.18	7.70125	7.90191	92.124	11493.4	1.51102	-1.97451	136.482	182.348	51.2963	0.667577
2128	fine_15	2128_1	PI 614679	2	2.5	1	7	10	TRUE	58	-0.568966	58	11.5971	1310.4	3630.56	3546.7	9748.38	48425.2	4461.61	229.702	217.568	0.81634	0.805919	10.2058	46.4649	1.50141	0.792859	63.8684	88.6826	9.52817	0.0650298
2128	fine_15	2128_2	PI 614679	2	10	1	2	3	TRUE	73.3	-0.568966	73.3	9.33021	6923.04	3781.12	3095.27	10713.7	37021.7	4279.03	96.1583	235.761	1.60741	1.11087	9.50148	59.2539	1.13064	0.47398	42.4464	81.7261	7.00656	0.0632444
2128	fine_15	2128_3	PI 614679	2	20	1	7	10	TRUE	21.8	-0.568966	21.8	5.6875	8133.29	1811.7	2473.15	6982.59	26645.4	3660.49	85.397	274.418	1.03666	0.374976	13.5894	62.8502	0.562123	0.247328	33.836	48.261	6.13218	0.0711032
2128	fine_15	2128_4	PI 614679	2	30	1	7	10	FALSE	25	-0.568966	25	6.1046	12067.2	1679.21	2299.3	8714.04	24965.4	3135.22	279.842	207.027	0.714463	0.406892	11.3564	46.8459	0.726136	0.37599	33.8901	52.4213	8.13272	0.0829402
2128	fine_15	2128_5	PI 614679	2	40	1	12	18	FALSE	4.9	-0.568966	4.9	17.419	99296.7	2382.02	4127.87	19699.3	33085.1	6342.88	162.162	446.073	0.979446	1.41596	21.3844	95.717	1.01414	-0.384102	44.6464	78.4068	17.0928	0.154183
2129	fine_02	2129_1	PI 647910	2	2.5	1	1	1	TRUE	84	0.515476	84	7.44579	805.201	3278.43	3213.68	6107.92	40041.1	2961.95	109.141	242.689	1.51462	0.897077	7.56906	46.1112	1.58563	0.623659	59.2038	70.1198	12.6242	0.0819722
2129	fine_02	2129_2	PI 647910	2	10	1	2	3	TRUE	204	0.515476	79.3	9.50756	5697.08	2483.53	2176.84	-209.313	34286.9	5039.11	620.748	213.469	1.29237	0.852722	7.98134	36.9143	1.92824	0.476782	34.3618	100.964	12.8071	0.0739972
2129	fine_02	2129_4	PI 647910	2	30	1	3	5	FALSE	127.3	0.515476	80.6	6.40747	13319	2168.53	2295	9604.32	27810	3981.75	376.006	447.177	1.91845	0.314058	14.4618	121.378	0.974422	0.291903	39.8956	70.0769	15.7697	0.0973984
2129	fine_02	2129_5	PI 647910	2	40	1	12	18	FALSE	51.2	0.515476	51.2	9.67181	44071	3849.38	4106.04	20818.7	44611.2	6263.39	120.123	962.753	5.05512	1.26479	32.0746	307.223	0.837778	0.694169	58.3185	80.8081	28.8423	0.293757
2138	fine_08	2138_1	DG023	3	2.5	1	3	6	TRUE	54.7	-0.859232	54.7	9.05513	1043.01	2879.76	1960.52	6003.4	27533.2	3133.95	51.6852	228.316	1.60728	0.0800685	8.10029	36.8865	0.827219	0.428385	39.407	61.7905	8.40323	0.0812608
2138	fine_08	2138_2	DG023	3	10	1	1	2	TRUE	32.7	-0.859232	32.7	8.26211	6283.08	2689.81	2046.09	11369.3	21556.6	3096.96	68.2784	196.514	1.06826	1.12038	12.1354	41.2901	0.541509	0.818267	26.3341	53.0277	7.93311	0.0670106
2138	fine_08	2138_3	DG023	3	20	1	2	3	TRUE	15.4	-0.859232	15.4	9.03482	10433.5	2726.67	3161.64	19776.5	30325.2	4111.11	102.084	367.97	2.10182	2.69153	22.2834	74.9426	1.1399	2.34767	41.7291	66.789	13.1773	0.201958
2138	fine_08	2138_4	DG023	3	30	1	7	10	FALSE	7.7	-0.859232	7.7	-0.282713	9401.86	2695.15	3135.13	-5448.28	36049.3	2869.85	76.5374	421.439	2.49552	0.704128	26.1047	112.004	0.654781	0.408423	52.2966	53.3786	17.2107	0.162912
2138	fine_08	2138_5	DG023	3	40	1	12	18	FALSE	3.6	-0.859232	3.6	28.294	29071.3	6083.48	5665.04	-3170.55	51436	90922.4	201.144	1646.98	4.48676	4.3028	58.8585	2790.22	1.64322	0.724438	61.7781	118.186	45.5096	0.489993
2140	fine_01	2140_1	PI 647897	2	2.5	1	4	7	TRUE	119	-0.443697	86.1	7.78973	1013.38	3366.4	2580.53	9084.83	51500.8	2823.88	109.584	172.984	1.10973	0.896892	5.18297	39.2836	1.45698	0.641247	49.1426	61.4381	10.9198	0.0655583
2140	fine_01	2140_2	PI 647897	2	10	1	2	3	TRUE	173.7	-0.443697	90.4	6.44346	6123.21	2665.45	2207.86	11385.3	40500.5	2968.29	93.7596	209.519	1.0151	0.991047	6.48075	45.8768	0.802103	0.383211	33.9529	57.589	10.0154	0.0673343
2140	fine_01	2140_3	PI 647897	2	20	1	5	8	TRUE	172.7	-0.443697	79.8	4.57734	6974.54	1822.36	2402.12	8676.02	33582.9	2502.47	56.1356	316.764	1.23999	0.779446	10.5008	64.4809	0.524939	0.34538	41.0071	40.4782	9.03299	0.0861897
2140	fine_01	2140_4	PI 647897	2	30	1	3	5	FALSE	66.2	-0.443697	66.2	6.02927	10230.6	2114.3	2757.15	9988.37	33489.8	2957.6	56.0323	448.138	2.74562	0.83283	13.7587	132.136	0.717123	0.292842	48.2129	48.8218	14.0647	0.121781
2140	fine_01	2140_5	PI 647897	2	40	1	12	18	FALSE	45.8	-0.443697	45.8	12.3684	35304.6	2717.04	4015.87	16246.5	45490	6732.52	104.178	896.437	4.30473	1.79416	33.9759	310.65	1.00839	0.51689	58.8494	81.9285	28.4528	0.269355
2145	fine_01	2145_1	PI 508735	2	2.5	1	4	7	TRUE	79.6	-0.00502513	79.6	6.80815	1025.74	3354.75	2878.88	8973.22	46803.9	2779.19	225.482	271.421	1.69234	1.2534	7.58094	59.4023	1.23157	0.550926	69.8677	59.1493	8.24293	0.108897
2145	fine_01	2145_2	PI 508735	2	10	1	2	3	TRUE	174.8	-0.00502513	82.3	7.83368	5821.59	3032.47	2567.98	11530.6	46033.4	3126.76	116.137	256.893	1.34925	1.09166	8.02723	55.7633	1.08361	0.41077	46.2408	62.487	9.87799	0.0978575
2145	fine_01	2145_3	PI 508735	2	20	1	5	8	TRUE	117.1	-0.00502513	81.4	5.60517	6811.98	2202.26	2360.96	9716.14	32085.8	2918.73	52.392	339.481	1.60867	0.818223	10.0536	81.6235	0.759831	0.307631	48.4183	50.2788	10.242	0.0862987
2145	fine_01	2145_5	PI 508735	2	40	1	12	18	FALSE	19.3	-0.00502513	19.3	12.3445	29933	3746.42	4830.95	18445.1	58162	5457.86	95.924	1095.51	8.19456	2.18252	31.9965	305.589	0.855409	0.558995	88.8624	70.2766	39.8188	0.331139
2148	fine_01	2148_1	PI 647905	2	2.5	1	4	7	TRUE	63.7	-0.532182	63.7	5.94209	849.272	3361.43	3022.04	9924.5	51913	2920.29	88.058	344.07	1.18398	1.36943	10.9256	75.4888	0.920665	0.583735	64.1761	48.6345	10.7138	0.0836152
2148	fine_01	2148_3	PI 647905	2	20	1	5	8	TRUE	34.7	-0.532182	34.7	6.46012	7242.77	2742.47	2527.41	10359.1	30264.4	2843.45	61.5122	748.813	2.41125	1.64827	20.3953	180.813	0.791822	0.432252	41.3612	49.0468	13.0131	0.317328
2148	fine_01	2148_5	PI 647905	2	40	1	12	18	FALSE	6	-0.532182	6	20.3611	42532.4	3182.63	4822.43	1631.19	35934.4	47971.9	186.65	786.477	4.32604	2.22253	34.7765	1702.72	0.931931	0.332589	59.748	108.902	26.2958	0.334822
2154	fine_01	2154_3	PI 647913	2	20	1	6	9	TRUE	110.6	NA	110.6	5.43952	10040.2	2544.9	2680.3	10154.9	34735.1	3048.12	58.2129	388.759	1.71746	0.890219	12.1868	87.2498	0.704549	0.334726	49.0124	52.4781	9.69151	0.105228
2154	fine_01	2154_4	PI 647913	2	30	1	7	10	FALSE	75.2	NA	75.2	5.31989	10967.8	2614.09	2419.47	11039.1	33081.6	3287.66	55.4026	551.77	2.4893	0.875261	14.674	145.623	0.675028	0.357697	48.1183	53.1995	13.37	0.136789
2154	fine_01	2154_5	PI 647913	2	40	1	12	18	FALSE	19.2	NA	19.2	12.411	33153.4	3415.28	4516.83	17042.4	45551.8	5834.39	97.0298	2112.37	6.54759	2.1467	68.331	445.157	0.907987	0.418526	74.5875	66.5881	34.7137	0.415282
2166	fine_07	2166_1	DG016	1	2.5	1	7	10	TRUE	98	-0.794898	98	8.91598	1303.22	4704.79	2962.53	11604.5	44119.9	4465.15	89.6643	362.952	2.42381	1.53709	9.30661	56.6343	0.925626	0.657693	78.1858	94.2009	13.0859	0.119738
2166	fine_07	2166_2	DG016	1	10	1	2	3	TRUE	76.1	-0.794898	76.1	6.58493	6835.05	3260.73	3538.23	-411.165	24455.2	3887.61	72.6104	350.372	2.22318	1.11413	10.7035	62.2877	0.983018	0.417433	46.4146	74.1155	6.05041	0.0993728
2166	fine_07	2166_3	DG016	1	20	1	5	8	TRUE	61	-0.794898	61	8.14712	9302.98	4311.06	2242.57	9521.44	24327.5	5751.36	61.5602	412.318	3.33718	1.26459	12.9086	93.0166	1.01693	0.423288	40.6079	114.463	7.46802	0.153879
2166	fine_07	2166_4	DG016	1	30	1	6	9	FALSE	20.1	-0.794898	20.1	17.6136	7745.28	1847.6	2121.62	9630.56	22471	3325.97	72.8439	364.119	1.55889	1.49353	16.7711	56.0796	0.428812	0.421225	39.4144	46.0467	11.527	0.117969
2166	fine_07	2166_5	DG016	1	40	1	12	18	FALSE	2.5	-0.794898	2.5	38.8125	19977.1	7683.5	7708.12	39427.8	77605.7	12048.3	217.243	1209.24	4.92062	4.24257	44.3128	192.725	1.23715	0.533447	107.633	125.25	29.6923	0.273368
2169	fine_12	2169_1	PI 403999	2	2.5	1	3	6	TRUE	255.4	-0.779953	95.3	3.68108	668.356	1858.71	1538.03	4353.68	32890	2398.77	656.013	108.226	0.517134	0.00361099	3.59888	25.2337	1.20095	0.262674	41.7435	55.6566	5.46763	0.0453771
2169	fine_12	2169_2	PI 403999	2	10	1	2	3	TRUE	196.3	-0.779953	78	7.1195	5316.62	2658.24	2434.16	7314.85	41536.5	3696.33	106.877	236.078	0.791951	0.90507	7.36142	45.2483	0.862434	0.483917	42.567	73.5042	8.50342	0.0845618
2169	fine_12	2169_3	PI 403999	2	20	1	6	9	TRUE	194.4	-0.779953	83.2	4.74924	7380.9	1253.35	1685.31	7837.52	16648.8	1731.89	41.951	273.309	0.720151	0.445993	12.7361	41.2536	0.338222	0.272256	21.6861	22.68	4.8269	0.051788
2169	fine_12	2169_4	PI 403999	2	30	1	6	9	FALSE	56.2	-0.779953	56.2	4.746	6068.05	2344.68	2473.4	10074.6	31912.5	3029.86	58.7433	564.18	2.07316	0.869084	18.1297	143.972	0.430549	0.411765	49.1291	44.0329	11.5449	0.177857
2169	fine_12	2169_5	PI 403999	2	40	1	12	18	FALSE	13.1	-0.779953	13.1	14.4656	19425	4848.45	4734.66	17319	47175.7	13823.3	98.976	1935.58	5.78658	2.22333	49.9421	618.976	0.765763	0.636034	76.9658	88.2806	29.7341	0.542304
2179	fine_14	2179_1	PI 614678	3	2.5	1	1	1	TRUE	177.8	-0.758155	106.1	2.87288	499.682	2532.05	2798.71	3100.83	37689	2210.2	763.519	126.265	0.728642	0.861146	5.2859	31.9341	3.06525	0.479122	48.502	54.8009	6.33225	0.0680363
2179	fine_14	2179_2	PI 614678	3	10	1	2	3	TRUE	49.7	-0.758155	49.7	5.23529	4698.49	2316.22	1754.59	14536.1	37870.7	2377.08	326.284	153.691	0.801703	1.22414	7.81606	41.3069	0.406762	0.545933	38.0534	47.5551	6.47618	0.0856003
2179	fine_14	2179_3	PI 614678	3	20	1	6	9	FALSE	35.1	-0.758155	35.1	12.5104	17036.2	4064.9	5703.71	27314	68302.7	8971.05	129.935	759.628	2.81692	1.52233	31.1351	148.886	1.45279	1.09404	86.5314	126.091	18.8245	0.167954
2179	fine_14	2179_4	PI 614678	3	30	1	8	12	FALSE	43	-0.758155	43	11.2421	9802.11	1318.52	2277.33	7468.54	28157.1	1891.99	3486.69	346.123	0.787134	1.36376	13.2976	80.6557	0.599581	0.317782	49.4263	29.3148	8.56501	0.119593
2179	fine_14	2179_5	PI 614678	3	40	1	12	18	FALSE	10.1	-0.758155	10.1	20.9436	35172.4	2995.51	4036.09	14521.7	41226.3	6586.21	1324.88	888.049	1.71991	2.48433	29.0745	163.2	1.37938	0.258578	76.3505	101.258	22.0004	0.257345
2181	fine_02	2181_1	PI 647906	2	2.5	1	4	7	TRUE	136	-0.704412	82.7	7.54714	1073.42	3713.14	2834.88	9081.66	46269.2	3116.72	196.94	337.504	1.91444	0.813922	8.69095	59.0697	1.10521	0.577843	60.2847	65.4374	11.0832	0.102676
2181	fine_02	2181_2	PI 647906	2	10	1	2	3	TRUE	278.3	-0.704412	88.9	7.68856	6560.64	3752.53	2293.2	12418.7	44060.7	4029.7	96.4781	440.301	2.6662	0.926997	9.45228	81.1718	0.695873	0.539786	42.5022	69.7473	11.9212	0.104427
2181	fine_02	2181_3	PI 647906	2	20	1	3	5	TRUE	93.2	-0.704412	93.2	7.3494	12143.8	4314.3	2363.2	13413	31962.7	5174.75	116.618	590.225	4.61783	1.21785	15.262	135.414	1.31277	0.514262	38.9205	103.925	14.147	0.210835
2181	fine_02	2181_4	PI 647906	2	30	1	8	12	FALSE	40.2	-0.704412	40.2	12.9438	22778.3	2446.29	2298.79	10351.8	26261.5	5573.11	83.5135	760.133	7.06567	1.28447	21.1097	228.548	0.832026	0.457897	35.1434	62.1161	17.0451	0.165281
2181	fine_02	2181_5	PI 647906	2	40	1	12	18	FALSE	9.6	-0.704412	9.6	21.2494	50357.6	5710.26	4342.14	18988.7	45588.3	11047.6	315.974	2179.17	14.2812	2.58627	42.512	378.834	2.08331	0.928154	59.8242	159.459	45.1394	0.471956
2184	fine_05	2184_1	DG002	3	2.5	1	5	8	TRUE	133.7	-0.883321	82.7	9.7007	1167.54	3815.84	2399.45	10335.8	40594.1	3629.52	79.9475	442.148	1.60505	0.715396	7.09963	50.1237	0.927307	0.774282	48.5465	68.8009	13.2813	0.101045
2184	fine_05	2184_3	DG002	3	20	1	3	5	TRUE	94.4	-0.883321	94.4	11.5643	17582	5406.61	1764.72	12044.7	23969.7	8103.71	64.8583	674.135	3.91821	1.6119	11.7516	117.652	2.30441	0.590213	28.8025	174.619	17.2124	0.217283
2184	fine_05	2184_4	DG002	3	30	1	8	11	FALSE	15.6	-0.883321	15.6	10.1492	13004.6	2261.66	1856.83	7325.68	19177	5944.18	57.7309	872.254	4.00551	1.38473	26.2671	224.065	0.639075	0.36855	25.1154	58.9868	13.2916	0.139389
2184	fine_05	2184_5	DG002	3	40	1	12	18	FALSE	4.3	-0.883321	4.3	27.0554	23574.7	2764.8	3495.15	18170.8	42091.9	5908.9	99.2497	1759.63	9.8831	3.24228	53.4236	381.311	0.573747	-0.307283	52.022	53.0055	24.3981	0.23566
2185	fine_02	2185_1	PI 647911	2	2.5	1	7	10	TRUE	198.3	-0.810893	82.3	11.3733	1192.64	3545.09	2383.25	8258.55	44716.4	3718.99	501.008	296.19	1.71892	1.25785	8.2708	47.2998	1.73726	0.721691	55.3298	83.3335	11.1137	0.0925603
2185	fine_02	2185_2	PI 647911	2	10	1	1	2	TRUE	232.2	-0.810893	109.4	4.51584	3940.87	2507.82	1593.56	6238.41	28982	2550.42	78.1365	208.163	1.1202	0.583497	5.24768	38.6635	0.580647	0.356949	30.5741	47.548	7.13015	0.0442194
2185	fine_02	2185_3	PI 647911	2	20	1	5	8	TRUE	80	-0.810893	80	5.89972	6374.94	2018.65	2148.26	9090.62	31059.3	2408.19	62.9372	399.47	2.31447	0.906064	11.0234	76.4107	0.453058	0.387963	43.3585	37.8449	10.1385	0.0557733
2185	fine_02	2185_4	PI 647911	2	30	1	7	10	FALSE	37.5	-0.810893	37.5	7.31024	16087.1	3387.66	2329.51	11873.2	31233.6	4811.35	71.551	648.453	4.10362	1.07203	14.5756	134.856	0.908378	0.432074	45.2418	83.7153	14.9105	0.119291
2185	fine_02	2185_5	PI 647911	2	40	1	12	18	FALSE	11.7	-0.810893	11.7	13.5053	56918	6369.5	4213.54	25155.2	56477.8	20806.1	135.129	1320.67	8.74382	2.28559	30.2219	605.664	2.11392	0.706456	72.1648	206.799	31.1021	0.296169
2196	fine_01	2196_1	PI 647914	2	2.5	1	5	8	TRUE	273.5	-0.725046	98.2	6.65136	729.935	4079.37	2548.73	9129.04	47356.5	2995.23	519.977	314.457	1.75562	1.23333	8.30281	63.5428	1.01316	0.704865	56.536	59.2989	8.75044	0.0983913
2196	fine_01	2196_2	PI 647914	2	10	1	1	2	TRUE	190.7	-0.725046	87.4	3.59356	3871.61	1792.07	1825.22	5410.51	36492.9	1713.41	52.251	97.8466	1.45615	0.817392	4.62078	40.2025	0.524188	0.332203	33.1339	36.0435	5.98467	0.0711913
2196	fine_01	2196_3	PI 647914	2	20	1	5	8	TRUE	155	-0.725046	76.6	6.29218	6319.27	2571.99	2474.71	9433.96	35724.7	2900.48	61.7482	333.858	1.98857	0.857946	8.833	77.109	0.923018	0.370976	52.6528	50.139	10.4435	0.11027
2196	fine_01	2196_4	PI 647914	2	30	1	7	10	FALSE	75.2	-0.725046	75.2	4.44451	9888.3	1834.02	2674.76	9512.7	35280.1	2333.43	136.738	305.804	2.31248	0.939905	12.6784	121.372	0.573472	0.333534	59.6132	37.7963	10.66	0.105401
2197	fine_01	2197_1	PI 647921	2	2.5	1	5	8	TRUE	116.8	-0.404966	97.1	5.90172	790.049	3038.98	2532.06	9106.82	47484.5	2502.53	73.5007	232.699	0.860768	0.773198	9.07134	51.0751	0.94774	0.531185	54.6432	49.9826	9.94233	0.0652019
2197	fine_01	2197_2	PI 647921	2	10	1	2	3	TRUE	250.4	-0.404966	83.1	7.03993	4653.47	3171.24	2426.58	5576.37	42190.2	3299.27	681.744	294.433	1.20954	1.15374	8.44866	59.6457	1.53072	0.440504	41.6949	62.5291	9.79603	0.07079
2197	fine_01	2197_3	PI 647921	2	20	1	4	7	TRUE	61.1	-0.404966	61.1	5.78446	6139.82	2120.1	2759.97	8823.31	36611.2	2642.3	70.6501	464.799	1.72986	0.906637	16.17	104.476	0.544814	0.362794	43.1125	41.9984	10.7826	0.0865092
2197	fine_01	2197_4	PI 647921	2	30	1	8	11	FALSE	69.5	-0.404966	69.5	5.28592	7791.73	1698.5	2351.53	9626.02	30969.6	2173.17	66.4341	578.363	3.24867	0.96676	17.9113	171.857	0.419148	0.345872	39.9155	28.4262	14.6298	0.153739
2202	fine_07	2202_1	DG014	1	2.5	1	1	1	TRUE	29.6	-0.702703	29.6	7.85501	1000	3694.41	2365.73	12256.1	34503.5	4147.65	75.2935	269.526	1.22716	0.971436	10.4633	33.2882	0.68002	0.839774	55.8872	83.244	8.42519	0.0903573
2202	fine_07	2202_2	DG014	1	10	1	1	2	TRUE	38.6	-0.702703	38.6	8.98658	7259.54	3894.13	2252.93	9827.58	25467.2	4482.75	68.0236	246.608	1.61632	1.12853	10.6656	43.3104	0.733163	0.644576	37.952	93.3113	6.17972	0.0886501
2202	fine_07	2202_3	DG014	1	20	1	5	8	TRUE	42.9	-0.702703	42.9	9.05489	7628.11	2530.78	2309.57	8852.15	25926.1	3058.17	76.5227	265.286	1.72095	0.938459	12.3053	50.6937	0.4023	0.30303	45.3249	53.2377	7.40914	0.0994673
2202	fine_07	2202_4	DG014	1	30	1	7	10	FALSE	8.8	-0.702703	8.8	10.7463	10653.6	3150.85	2779.26	14470.9	33213.2	4563.36	65.4627	433.202	1.71587	1.04482	18.4804	137.145	0.548292	0.166058	53.6337	74.9024	9.27329	0.183007
2202	fine_07	2202_5	DG014	1	40	1	12	18	FALSE	7.3	-0.702703	7.3	30.9577	58209	8516.22	5830.82	29614.7	48539.3	15630.8	230.94	1538.41	4.63105	3.00849	54.5586	225.565	2.6746	0.98655	72.7935	203.729	35.6916	0.706065
2203	fine_01	2203_1	PI 647908	2	2.5	1	5	8	TRUE	108.8	-0.0441176	108.8	6.75924	1033.8	3568.21	3015.61	10193.7	49023.2	3222.85	110.929	281.129	1.51624	0.961273	8.86952	60.4871	1.15258	0.752101	65.3052	64.3541	13.0601	0.0790636
2203	fine_01	2203_3	PI 647908	2	20	1	5	8	TRUE	136.2	-0.0441176	91.9	5.31082	5993.15	1945.56	2345.21	8548.35	33466.5	2639.37	58.4789	336.189	1.49205	0.741817	10.3075	67.2996	0.571681	0.321976	45.6935	41.4331	10.0355	0.0683088
2203	fine_01	2203_4	PI 647908	2	30	1	7	10	FALSE	104	-0.0441176	104	5.76001	5702.03	1317.95	1865.14	5592.42	26069.2	1749.61	274.231	206.447	1.69614	0.775414	7.30098	64.914	0.452826	0.251287	41.38	29.4122	6.6719	0.0592217
2203	fine_01	2203_5	PI 647908	2	40	1	13	20	FALSE	88.8	-0.0441176	88.8	4.81589	10448	2815.43	2892.16	10727.3	33533.3	2663.37	116.528	452.807	3.0829	0.670248	11.2319	141.767	0.700408	0.413436	49.7898	48.8636	13.5143	0.0999788
2207	fine_21	2207_1	DG033	3	2.5	1	5	8	TRUE	113	-0.923894	113	8.90808	1199.53	3995.06	3114.96	9681.79	46690.5	4218.14	70.218	245.375	1.26622	1.13309	9.56146	54.2092	1.33707	0.609942	69.0713	95.2646	10.8098	0.105519
2207	fine_21	2207_2	DG033	3	10	1	2	3	TRUE	52	-0.923894	52	8.41762	8238.95	3609.22	3271.51	12491.5	37371.7	4407.41	96.7575	371.722	2.57611	1.46971	14.2414	82.7216	0.820486	0.562591	59.8882	81.2975	7.41713	0.110159
2207	fine_21	2207_3	DG033	3	20	1	5	8	TRUE	18.2	-0.923894	18.2	5.99028	10241.1	1562.46	2489.49	8928.47	23417.2	3127.21	84.2695	395.663	1.85038	1.17378	20.4425	80.5403	0.684353	0.371624	40.3336	48.4135	10.2258	0.118816
2207	fine_21	2207_4	DG033	3	30	1	8	11	FALSE	8.6	-0.923894	8.6	16.5235	14646.2	1281.43	2505	10351.5	22449.1	2601.99	57.8841	492	2.3285	1.10904	26.2848	149.141	0.401088	0.440853	41.7648	33.9595	15.5906	0.20015
2207	fine_21	2207_5	DG033	3	40	1	13	20	FALSE	3.1	-0.923894	3.1	21.9821	32934.8	2247.54	2779.05	9481.39	9062.11	28775.9	174.601	1164.38	1.50903	-2.99755	35.9256	1322.08	0.696454	0.052209	36.5597	88.2681	31.9742	0.582553
2209	fine_04	2209_1	PI 647920	3	2.5	1	4	7	TRUE	72	-0.530556	72	15.7659	1320.23	4192.98	3149.31	12097.9	51277.2	4973.83	372.324	279.156	1.93059	1.19691	10.0382	56.969	2.40224	1.03259	66.3792	87.7261	14.5347	0.0701708
2209	fine_04	2209_2	PI 647920	3	10	1	1	2	TRUE	185.7	-0.530556	74.4	6.76444	4721.85	2130.26	2012.54	7196.67	29445.2	3114.39	55.2456	213.226	1.44673	0.536193	6.10632	43.5394	0.574029	0.45489	28.9352	49.7219	8.73445	0.0578259
2209	fine_04	2209_3	PI 647920	3	20	1	6	9	FALSE	44.6	-0.530556	44.6	11.5918	2267.04	5330.97	4328.73	13649.9	65978.7	8119.07	150.207	505.44	2.35064	1.27114	12.5538	82.0371	1.66146	1.33387	96.4431	152.964	11.7942	0.09548
2209	fine_04	2209_4	PI 647920	3	30	1	8	11	FALSE	33.8	-0.530556	33.8	5.57944	8430.79	2017.12	2407.01	10779.6	32497.1	2792.33	48.0668	435.365	3.55298	0.763201	14.8948	124.662	0.229536	0.376323	56.1164	33.0859	14.4382	0.188371
2211	fine_01	2211_1	PI 647900	2	2.5	1	7	10	TRUE	89.1	-0.331089	89.1	8.94988	1172.1	3530.27	3042.92	11641.2	53910.3	2400.43	267.558	322.069	4.49245	1.91083	8.18763	73.4005	1.79456	1.08	73.0896	59.2158	13.5442	0.164639
2211	fine_01	2211_2	PI 647900	2	10	1	2	3	TRUE	67.9	-0.331089	67.9	7.80782	4633.13	2589.55	2589.33	12348.5	49414.8	2262.99	87.2919	228.094	4.13081	1.50308	7.84215	67.5544	0.831164	0.685251	44.7593	47.4341	9.74243	0.108478
2211	fine_01	2211_3	PI 647900	2	20	1	6	9	TRUE	44.6	-0.331089	44.6	8.69271	5971.42	1646.63	2566.22	10602.2	36002.7	4031.87	66.5934	303.192	2.59315	1.3092	10.1618	108.182	0.623796	0.481948	48.2432	34.6032	9.70587	0.121812
2211	fine_01	2211_4	PI 647900	2	30	1	8	11	FALSE	59.6	-0.331089	59.6	6.26744	7309.19	1633.66	2456.05	9063.72	32368.9	2153.12	261.272	329.638	3.2275	1.32633	10.6759	108.618	0.524671	0.436476	57.8964	36.0627	11.0631	0.127199
2218	fine_19	2218_1	PI 647923	3	2.5	1	4	7	TRUE	126.9	-0.903861	91.1	8.49562	1087.4	4194.22	2727.16	10196.6	43330.9	4549.72	69.5614	282.25	1.70654	1.02291	9.07702	48.5168	0.848174	0.829229	64.6872	78.5818	11.0155	0.0700463
2218	fine_19	2218_2	PI 647923	3	10	1	2	3	TRUE	67.3	-0.903861	67.3	9.11004	5364.09	2385.69	3511.62	-1394.58	28513.2	3628.87	71.3304	245.232	1.81758	1.05299	11.8222	47.2222	0.809491	0.667568	43.9842	63.008	6.28723	0.0677663
2218	fine_19	2218_3	PI 647923	3	20	1	6	9	TRUE	19.6	-0.903861	19.6	23.5653	7123.04	2215.78	2417.41	11113.7	30476.5	3523.38	74.4025	346.274	2.23714	1.5019	20.1358	56.9533	0.684628	0.729336	43.1959	49.5956	6.92835	0.0831898
2218	fine_19	2218_4	PI 647923	3	30	1	2	4	FALSE	12.2	-0.903861	12.2	15.434	23177	3823.16	2225.4	38897.1	24030.8	6613.33	97.6355	573.209	3.73527	3.34773	19.2715	68.0247	1.48778	1.6783	35.8194	141.898	9.17799	0.106508
3006	fine_20	3006_1	DG020	1	2.5	2	6	9	FALSE	27.8	NA	27.8	16.5318	1764.27	6173.99	2704.25	14983.1	35994.2	4754.94	62.0672	903.622	7.64447	4.68066	17.7938	138.193	0.862187	0.996826	58.7662	93.436	13.5857	0.331036
3006	fine_20	3006_2	DG020	1	10	2	2	3	TRUE	30.4	NA	30.4	13.838	9347.85	4177.94	2718.76	19808.1	30001.5	4277.06	97.9638	447.346	4.95036	2.25875	18.6371	92.1013	0.621277	0.858103	44.3882	81.8767	6.33081	0.168148
3006	fine_20	3006_3	DG020	1	20	2	6	9	FALSE	3.3	NA	3.3	51.2145	16577.1	5865.45	3639.26	25525	41714.9	18724.2	129.428	886.988	9.69554	3.5568	30.8958	293.352	1.29087	0.828614	57.1346	136.861	8.23823	0.422923
3006	fine_20	3006_5	DG020	1	40	2	14	21	FALSE	2.2	NA	2.2	18.1931	7740.47	5391.4	6450.4	46993.1	27902.2	8730.93	196.824	1565.03	6.183	1.9964	35.3384	197.088	1.18529	-0.078327	82.0763	121.266	16.0294	0.463102
3021	fine_02	3021_1	PI 647911	2	2.5	2	4	7	TRUE	210.7	-0.776934	83.6	5.18455	1026.96	3622.43	2823.6	9818.28	47801.5	3568.26	95.7139	223.308	0.901248	0.783609	6.10646	49.8492	0.799189	0.612471	63.5463	73.9528	10.9353	0.0564151
3021	fine_02	3021_2	PI 647911	2	10	2	3	5	TRUE	151.9	-0.776934	87.7	7.93159	6860.58	3164.21	2638.24	9247.65	37466.7	10257.4	90.2083	344.834	1.24847	1.09847	8.8002	172.017	0.755377	0.489924	43.6787	62.2334	11.1768	0.0674752
3021	fine_02	3021_3	PI 647911	2	20	2	5	8	TRUE	147.7	-0.776934	81.5	3.88914	8027.2	2384.23	2293.48	9549.1	31305.4	2538.16	39.8597	358.858	2.38927	0.711838	9.21644	78.0792	0.352783	0.370816	44.7485	40.7188	10.161	0.0491592
3021	fine_02	3021_4	PI 647911	2	30	2	2	4	FALSE	47	-0.776934	47	6.38508	6650.63	2826.74	2802.09	9933.64	30699.9	2876.09	62.4482	634.634	3.32311	1.21187	14.8152	140.985	0.718931	0.563349	46.5482	42.8652	16.8971	0.129492
3021	fine_02	3021_5	PI 647911	2	40	2	13	19	FALSE	18.9	-0.776934	18.9	30.8241	19321.3	3238.99	2752.87	13864.4	30282	6554.43	79.8588	864.146	3.54377	0.83456	13.3022	239.473	0.778248	0.674572	41.5282	80.9406	22.9839	0.111666
3024	fine_07	3024_1	DG022	1	2.5	2	3	6	TRUE	48.8	-0.454918	48.8	13.3562	2585.3	5427.68	3232.29	14201.2	42206.3	5386.03	78.1459	474.419	3.53474	1.48931	16.206	63.0677	0.757195	0.920128	63.7942	102.886	15.6013	0.192654
3024	fine_07	3024_2	DG022	1	10	2	1	2	TRUE	32.2	-0.454918	32.2	7.8654	5366.28	2333.17	1660.5	9331.07	18689.7	3100.16	90.9744	342.7	3.02481	1.77719	12.7031	57.6623	0.360468	0.817423	27.2415	56.8473	6.19563	0.146359
3024	fine_07	3024_3	DG022	1	20	2	5	8	TRUE	17.9	-0.454918	17.9	11.5755	8140.63	2170.47	2125.53	5138.5	21845.6	3279.94	62.7621	353.129	2.7271	1.46482	14.1154	53.9266	0.351422	0.413722	36.1992	65.5432	8.28986	0.105885
3024	fine_07	3024_4	DG022	1	30	2	3	5	FALSE	26.6	-0.454918	26.6	15.1926	9356.11	2703.48	2385.08	7979.73	24700.8	4840.66	98.3337	429.949	2.12621	0.254762	18.1203	99.0471	0.517287	0.394947	42.9811	65.6609	14.7113	0.135977
3024	fine_07	3024_5	DG022	1	40	2	12	18	FALSE	14.4	-0.454918	14.4	16.5569	78228.8	6609.48	3979.4	19901.1	34853.9	13191.6	119.112	1002.81	5.53883	2.54767	27.6045	132.799	2.27266	0.664149	61.6722	250.653	20.7843	0.272351
3027	fine_07	3027_1	DG016	1	2.5	2	3	6	TRUE	52.7	-0.850095	52.7	13.2524	1627.9	4788.87	2940.36	11745.4	42540.9	4478.82	84.8674	405.829	3.39372	3.33226	9.52411	49.1046	1.04426	0.589521	69.7349	84.6396	13.2524	0.10747
3027	fine_07	3027_2	DG016	1	10	2	2	4	TRUE	37.7	-0.850095	37.7	9.87445	5563.58	2606.97	2286.33	16397.1	26917.9	3260.81	75.9697	344.568	3.69931	2.14447	11.1041	54.0649	0.484504	0.606924	46.7589	54.87	7.4821	0.121535
3027	fine_07	3027_3	DG016	1	20	2	5	8	FALSE	4.9	-0.850095	4.9	3.00198	7118.55	2199.73	2858.11	9084.16	33999.1	3866.85	82.6374	265.615	2.88293	2.16616	16.2913	112.226	0.463752	-0.17518	56.4994	45.71	7.8229	0.113023
3027	fine_07	3027_4	DG016	1	30	2	8	11	FALSE	7.9	-0.850095	7.9	12.7497	4662.49	1287.01	1939.38	6616.29	21176.2	5031.47	64.2385	248.085	4.65158	2.01016	16.554	214.826	0.25203	0.467164	39.5093	22.0961	6.83019	0.0851481
3034	fine_08	3034_1	DG021	3	2.5	2	6	9	TRUE	63.8	-0.932602	63.8	12.6949	1961.44	5541.88	3714.35	12081.7	43636.2	4051.89	84.4919	402.643	5.06062	2.05565	12.468	90.9155	1.19525	0.987329	64.8483	84.0249	13.7504	0.21266
3034	fine_08	3034_2	DG021	3	10	2	2	3	TRUE	26.5	-0.932602	26.5	10.854	8322.85	4475.23	3149.5	15840	33009.7	4396.08	745.745	377.816	3.46458	2.48248	22.9999	82.2246	1.1705	1.07197	47.0535	83.2361	11.5395	0.153522
3034	fine_08	3034_3	DG021	3	20	2	5	8	FALSE	10.4	-0.932602	10.4	8.87344	7742.71	3022.12	2621.09	7253.23	25148.9	3113.74	75.8349	528.023	5.8193	2.23562	37.9551	140.769	0.729439	0.539268	40.4986	64.7827	17.195	0.18527
3034	fine_08	3034_4	DG021	3	30	2	8	11	FALSE	4.3	-0.932602	4.3	15.6715	9661.95	1573.77	2414.66	14375.3	27349.1	70.7829	71.9509	540.577	8.61202	2.63063	44.5873	156.482	0.420929	0.793598	44.0872	36.8925	16.2863	0.296393
3036	fine_01	3036_1	PI 647898	2	2.5	2	4	7	TRUE	96.9	-0.667699	96.9	7.52698	1029.21	3778.99	3297	11829.4	54858.2	3318.99	66.1624	323.176	1.48456	0.86569	8.80227	69.2355	1.52782	0.877015	69.397	65.806	13.9287	0.0977179
3036	fine_01	3036_2	PI 647898	2	10	2	2	4	TRUE	73	-0.667699	73	8.31345	6270.73	2730.05	3515.12	6477.96	39152.5	2681.22	82.0682	377.763	3.77613	1.31149	11.3844	79.0398	1.41992	0.539033	48.6255	53.9394	11.2446	0.177225
3036	fine_01	3036_3	PI 647898	2	20	2	6	9	TRUE	19.5	-0.667699	19.5	9.84999	6432.75	1821.1	2316.63	10741.7	32741.2	3182.26	63.0133	495.499	3.51148	1.62861	16.0337	97.7784	0.519709	0.524264	44.3864	42.7147	11.1762	0.123956
3036	fine_01	3036_4	PI 647898	2	30	2	2	4	FALSE	32.2	-0.667699	32.2	10.527	7397.6	1959.24	2605.49	12460.2	31413.9	2753.5	79.8575	724.383	3.94502	1.80244	17.6471	139.652	0.810026	0.574646	48.051	42.0358	16.3939	0.192472
3039	fine_01	3039_1	PI 647900	2	2.5	2	4	7	TRUE	116.9	-0.627032	89.5	5.32021	835.6	3037.27	3100.78	8527.39	49641.3	2604.72	52.8614	190.107	1.4859	1.03308	6.57788	70.9207	1.4817	0.622261	71.0646	44.6952	11.6225	0.0918851
3039	fine_01	3039_2	PI 647900	2	10	2	1	2	TRUE	76.8	-0.627032	76.8	4.97088	4565.04	2408.35	1431.54	11414.3	34241.9	2528.61	58.0492	189.136	1.9657	1.00197	6.72784	52.7734	0.40673	0.398043	28.065	49.631	7.80563	0.110658
3039	fine_01	3039_3	PI 647900	2	20	2	6	9	TRUE	31.6	-0.627032	31.6	6.83015	6019.89	2323.06	3024.78	11175.6	35698.4	11035.2	310.419	443.895	2.18128	1.16359	14.3175	283.472	0.540739	0.531022	48.1021	47.7789	12.5127	0.130155
3039	fine_01	3039_4	PI 647900	2	30	2	8	11	FALSE	43.6	-0.627032	43.6	5.38172	9127.32	1400.54	2417.62	8213.26	30640.5	1921.33	71.4284	338.57	2.74519	0.910205	13.4931	116.044	0.24958	0.362687	49.1581	30.8454	11.2529	0.111306
3040	fine_01	3040_1	PI 647921	2	2.5	2	4	7	TRUE	159.6	-0.684837	86.5	4.97524	874.351	4033.6	2748.4	9230.8	52183	2772.55	125.259	267.815	0.888815	0.735067	7.01872	45.4406	1.51323	0.588058	62.0169	57.4629	9.35649	0.0876486
3040	fine_01	3040_2	PI 647921	2	10	2	1	2	TRUE	101.3	-0.684837	101.3	5.59796	5056.64	2665.76	2288.46	6296.46	31048.2	2872.7	180.284	247.046	1.2193	0.973302	7.02814	48.2745	1.15257	0.378179	32.9153	55.996	6.83046	0.080498
3040	fine_01	3040_3	PI 647921	2	20	2	6	9	TRUE	104.4	-0.684837	104.4	5.63274	7518.95	2458.63	2169.57	9534.03	31520.1	3006.07	40.6642	409.999	1.66184	0.927499	9.77242	88.0401	0.703204	0.352637	44.8622	49.3181	8.94294	0.114053
3040	fine_01	3040_4	PI 647921	2	30	2	7	10	FALSE	50.3	-0.684837	50.3	5.52169	10090.1	2598.29	2459.82	9982.75	32773.4	20679.1	78.2006	499.161	3.47175	1.32116	14.959	432.075	0.513742	0.344319	48.5667	50.7269	12.6646	0.121985
3051	fine_01	3051_1	PI 508735	2	2.5	2	3	6	TRUE	213.6	-0.645599	86.1	6.0302	586.323	3488.66	2392.02	7545.08	50483.9	2572.39	317.674	190.004	0.825188	0.405042	6.14704	39.2805	1.31978	0.572103	43.2496	47.0235	8.83934	0.0418822
3051	fine_01	3051_3	PI 508735	2	20	2	3	5	TRUE	106.9	-0.645599	106.9	5.82166	7118.7	2574.46	2624.59	10810	36628.1	2793.42	49.4541	341.785	1.85907	1.05336	11.8945	93.4793	0.581527	0.432409	38.8001	43.4943	9.27314	0.0793027
3051	fine_01	3051_4	PI 508735	2	30	2	8	12	FALSE	75.7	-0.645599	75.7	9.40881	15661.1	3516.99	2496.97	11910.3	30992.5	4204	146.709	617.843	2.50789	0.823197	15.2766	154.794	0.992639	0.398874	35.8623	65.5288	14.0907	0.134393
3051	fine_01	3051_5	PI 508735	2	40	2	13	19	FALSE	7	-0.645599	7	15.386	4525.83	2100.89	3315.96	-778.706	15962.6	9882.38	99.7873	742.943	2.93884	0.722651	20.0805	474.901	0.552067	0.219911	45.0476	42.7379	15.2254	0.121146
3057	fine_02	3057_1	PI 647910	2	2.5	2	3	6	TRUE	132.9	-0.373213	80.3	3.6804	499.709	2131.97	1412.66	3689.11	30505.6	1962.77	137.914	100.943	0.379489	-0.201302	2.91276	20.3736	0.778917	0.246564	29.526	44.1504	4.67726	0.0215656
3057	fine_02	3057_2	PI 647910	2	10	2	2	4	TRUE	125.4	-0.373213	89.9	6.84866	5729.02	2346.21	2702.11	7364.11	37946.4	2477.98	94.2943	243.406	0.620067	0.647333	6.97875	42.4052	0.885463	0.398413	42.1613	44.1054	8.03129	0.0532692
3057	fine_02	3057_3	PI 647910	2	20	2	2	4	TRUE	121.7	-0.373213	91.9	5.2285	7278.87	2739.36	2230.37	13834	37172	3557.36	55.0913	356.792	1.53468	0.987234	10.5274	74.6884	0.454164	0.429047	48.8802	52.4611	9.79989	0.0558639
3057	fine_02	3057_4	PI 647910	2	30	2	9	13	FALSE	83.3	-0.373213	83.3	4.11634	10122	3110.73	2311.46	11247.2	29844.9	3049.43	72.6855	517.316	2.86638	0.780447	13.9545	127.022	0.545909	0.364638	40.9693	42.7073	11.9164	0.107613
3057	fine_02	3057_5	PI 647910	2	40	2	13	20	FALSE	34.8	-0.373213	34.8	10.1561	14609.1	3659.87	2553.32	12519.1	28486.3	4961.68	84.2333	774.155	2.40973	0.787572	12.6072	141.897	1.48116	0.541665	35.97	95.4159	20.9572	0.138832
3061	fine_11	3061_1	PI 377709	2	2.5	2	1	1	TRUE	75.7	-0.265522	75.7	4.8306	645.555	2770.04	2752.16	7688.44	43772.1	2192.7	126.611	146.725	1.28201	0.950788	5.72668	35.9252	1.0409	0.539495	41.8272	45.7134	8.65881	0.0476946
3061	fine_11	3061_3	PI 377709	2	20	2	2	4	TRUE	71.3	-0.265522	71.3	6.70657	8024.56	2507.99	2941.48	12140.3	34508.8	3722.87	58.7867	338.103	1.89691	1.04401	12.3262	80.5657	0.772468	0.522128	48.5475	58.8542	11.7959	0.121794
3061	fine_11	3061_4	PI 377709	2	30	2	9	13	FALSE	55.6	-0.265522	55.6	5.62022	12113.6	2186.68	2445.16	10808.5	26609.1	3453.48	51.0234	417.529	2.20775	0.954852	16.2603	128.022	0.477884	0.311085	38.4554	47.7081	14.7502	0.140083
3061	fine_11	3061_5	PI 377709	2	40	2	13	19	FALSE	14.2	-0.265522	14.2	26.0837	14739.3	3041.49	3095.08	9231.68	36032.1	5318.82	90.5075	697.052	3.30764	1.35581	19.8063	175.861	0.711062	0.481041	49.7247	64.3921	24.3287	0.233907
3062	fine_04	3062_1	PI 647920	3	2.5	2	3	6	TRUE	146.3	-0.786056	85.9	4.59598	631.928	2341.9	1750.67	6223.31	33611.2	2549.15	122.296	120.09	0.63132	0.0102798	4.33615	33.5224	0.672981	0.335307	28.7948	42.6078	6.05536	0.0131952
3062	fine_04	3062_3	PI 647920	3	20	2	6	9	TRUE	68.1	-0.786056	68.1	6.62078	5801.63	2584.37	2355.22	10135	32435.6	4886.89	52.9305	465.668	2.71173	0.903967	14.3018	115.483	0.347928	0.399807	45.3223	46.5407	10.0623	0.0966838
3062	fine_04	3062_4	PI 647920	3	30	2	9	13	FALSE	31.3	-0.786056	31.3	7.22313	11746.9	3172.55	2639.73	9101.68	26787.3	6638.87	58.7699	650.275	3.11542	1.34781	23.6038	266.183	0.753437	0.393279	40.9776	50.2974	14.721	0.265135
3062	fine_04	3062_5	PI 647920	3	40	2	13	19	FALSE	13.2	-0.786056	13.2	31.02	16082.4	2690.84	2894.36	3966.59	27891.3	4673.96	137.796	806.578	2.41238	0.862289	20.8806	135.717	0.588586	0.585841	45.5318	60.2112	22.5418	0.173496
3076	fine_01	3076_2	PI 647914	2	10	2	1	2	TRUE	112.2	NA	112.2	4.1207	4242.19	2180.1	1869.58	5299.09	30267.5	1942.7	53.5152	149.926	1.22378	0.636649	5.77159	34.7631	0.529558	0.285681	32.0737	40.942	6.92308	0.0541134
3076	fine_01	3076_3	PI 647914	2	20	2	8	11	TRUE	54.2	NA	54.2	4.86619	9484.89	1658.68	2487.71	8028.9	29628.8	1885.61	48.5941	259.793	2.44354	0.87876	12.7352	81.4929	0.405199	0.291753	44.6961	28.7407	9.24198	0.0609372
3076	fine_01	3076_5	PI 647914	2	40	2	13	19	FALSE	40	NA	40	15.7234	19443	3075.24	2656.07	8540.95	29392.2	3382.32	59.1647	441.039	4.10361	0.77121	13.0223	114.333	0.943578	0.400419	41.456	73.9701	14.1865	0.15339
3079	fine_05	3079_1	DG001	3	2.5	2	3	6	TRUE	162.1	-0.628007	95.4	4.86825	713.348	3277.86	1818.1	7955.06	30943.4	2618.52	52.2212	271.098	0.856222	0.0269206	4.52465	38.8403	0.621923	0.461009	38.5854	50.1348	8.40201	0.0549086
3079	fine_05	3079_2	DG001	3	10	2	1	2	TRUE	66.5	-0.628007	66.5	5.92612	4568.78	2527.13	1917.94	7577.01	26769.5	2365.42	64.6694	321.986	1.14901	0.778281	6.95752	48.8151	0.320558	0.497833	29.9211	38.936	6.59033	0.066835
3079	fine_05	3079_3	DG001	3	20	2	5	8	TRUE	31.4	-0.628007	31.4	9.64387	6597.46	3357.73	1994.88	9596.24	21164.9	4253.88	59.6119	815.157	2.76213	0.886816	15.5143	161.696	0.507188	0.396154	27.2751	53.5898	11.6384	0.181849
3079	fine_05	3079_4	DG001	3	30	2	9	13	FALSE	60.3	-0.628007	60.3	10.2403	37851.5	3626.2	1806.19	11900.9	19182	6061.24	70.7535	781.92	4.48034	1.42155	16.116	169.554	4.03147	0.463203	26.3605	98.835	17.7226	0.214986
3079	fine_05	3079_5	DG001	3	40	2	13	19	FALSE	17.7	-0.628007	17.7	37.7296	15495.9	2488.39	2159.85	6238.05	25571.1	3767.8	107.293	955.246	1.64741	0.781953	17.5169	111.387	0.748037	0.616968	32.6508	53.2661	21.0928	0.109296
3084	fine_07	3084_1	DG019	1	2.5	2	3	6	TRUE	45.8	-0.757642	45.8	4.80099	1041.41	2682.43	1907.39	4299.48	26517.8	2623.44	58.6948	208.065	1.08695	-0.757599	7.17286	22.8538	0.449685	0.208959	38.2049	54.7654	6.47397	0.0435782
3084	fine_07	3084_2	DG019	1	10	2	1	2	TRUE	66.6	-0.757642	66.6	5.19215	6059.63	2649.39	1868.77	6971.95	22213.8	2732.9	97.597	208.423	1.03887	0.800354	7.62712	30.0512	0.383205	0.39753	32.1833	52.2441	4.09049	0.0541052
3084	fine_07	3084_4	DG019	1	30	2	8	12	FALSE	11.1	-0.757642	11.1	12.7472	17076	2461.56	1840.16	8669.83	19464.1	6231.65	574.84	404.58	2.62986	1.69975	20.4238	175.786	0.671327	0.38315	34.5637	69.5081	9.05435	0.152047
3091	fine_13	3091_1	PI 576134	2	2.5	2	1	1	TRUE	89	-0.0730337	89	3.22448	516.209	2526.8	1291.15	9593.68	40492.8	2367.01	41.5014	139.175	0.923622	0.614988	4.79935	30.4229	0.219855	0.373069	51.1897	41.8954	5.65744	0.048861
3091	fine_13	3091_2	PI 576134	2	10	2	2	3	TRUE	123	-0.0730337	123	5.23585	7442.73	2431.15	2722	7831.71	33091.9	3311.69	82.3427	244.875	1.22605	0.809332	8.38769	56.0915	0.577524	0.423523	41.0281	53.0664	8.17753	0.0841493
3091	fine_13	3091_3	PI 576134	2	20	2	6	9	TRUE	52.2	-0.0730337	52.2	7.50642	6661.08	2115.49	2602.54	11571.7	30192.3	3431.95	62.1442	432.914	2.33326	1.18261	13.45	114.261	0.323151	0.446158	49.0781	40.7894	9.54238	0.0812885
3091	fine_13	3091_4	PI 576134	2	30	2	9	13	FALSE	82.5	-0.0730337	82.5	5.38984	8756.22	1895.31	2524.78	11799	25809.8	2534.61	58.3563	462.521	3.16946	1.1298	18.0852	162.265	0.175711	0.433493	42.753	24.176	11.2613	0.080919
3092	fine_01	3092_1	PI 647908	2	2.5	2	1	1	TRUE	121	-0.528926	121	4.30915	846.557	3150.57	2123.88	6488.17	40849.4	2151.59	107.661	132.325	1.19993	0.564731	4.25204	20.4742	0.955271	0.359576	57.4099	52.0096	8.81637	0.03552
3092	fine_01	3092_3	PI 647908	2	20	2	4	7	TRUE	62.7	-0.528926	62.7	5.23226	6998.92	2455.18	2693.55	8996.46	30994.4	2716.55	53.8236	327.753	1.58486	0.719697	13.5154	76.443	0.744489	0.321198	51.3974	46.6787	10.2562	0.130689
3092	fine_01	3092_4	PI 647908	2	30	2	8	12	FALSE	57	-0.528926	57	9.51187	20704.5	2254.71	2384.66	11177.1	26555.4	6429.69	183.18	323.023	3.00761	1.00246	14.4065	101.17	2.0483	0.438316	42.8009	112.684	13.164	0.133781
3092	fine_01	3092_5	PI 647908	2	40	2	12	18	FALSE	23.1	-0.528926	23.1	10.3865	78388.3	5566.72	4644.46	18728.3	38609.8	27091.2	101.303	985.94	4.54611	1.64885	30.1373	865.533	2.31025	0.671114	63.7953	160.386	29.3136	0.374898
3097	fine_01	3097_1	PI 647905	2	2.5	2	1	1	TRUE	28.2	-0.0780142	28.2	3.76113	530.166	2629.76	2174.29	8018.51	37855.4	1564.83	1259.24	147.689	3.18261	1.6176	7.32979	43.78	1.11748	0.862368	64.2895	61.653	5.89533	0.0801907
3097	fine_01	3097_2	PI 647905	2	10	2	7	10	TRUE	70.4	-0.0780142	70.4	5.62148	6089.66	2540.58	2932.19	8380.51	45197.6	2461.08	70.7698	180.909	1.78542	1.24283	8.69781	58.7788	0.826976	0.408965	56.0789	54.963	6.55288	0.0964383
3097	fine_01	3097_3	PI 647905	2	20	2	7	10	TRUE	65.6	-0.0780142	65.6	4.51569	6587.51	2220.19	2709.81	8617.14	39926.2	2355.68	48.8246	240.111	1.68065	0.784965	9.3783	68.5129	0.67844	0.338883	70.457	44.4858	6.99624	0.105825
3097	fine_01	3097_4	PI 647905	2	30	2	8	12	FALSE	26	-0.0780142	26	7.44471	8212.06	1708.26	2362.28	10811	32145.2	2835.36	70.7269	502.134	1.59067	0.618677	14.4345	106.585	0.552205	0.387329	60.4211	38.2519	13.5819	0.204543
3097	fine_01	3097_5	PI 647905	2	40	2	11	16	FALSE	22.7	-0.0780142	22.7	14.5629	14870.6	3032.71	4567.73	11369.9	50525.8	4205.56	1343.51	615.426	2.26297	1.64314	25.2547	182.994	0.852562	0.550285	92.0196	52.2637	21.4509	0.230508
3105	fine_05	3105_3	DG002	3	20	2	6	9	TRUE	39.2	NA	39.2	11.145	9507.62	2688.47	1980.89	8805.62	24119.5	3785.31	61.1788	719.781	2.78228	1.18506	18.3549	105.544	0.748931	0.597542	34.0224	64.1142	13.9745	0.105034
3105	fine_05	3105_4	DG002	3	30	2	8	12	FALSE	17.3	NA	17.3	11.9086	26116.5	3023.66	1792.72	10909.9	21030.8	4270.42	67.3007	1000.96	5.37705	1.59328	23.4416	166.481	1.66638	0.52862	30.3703	73.5286	19.1587	0.177303
3105	fine_05	3105_5	DG002	3	40	2	12	18	FALSE	8.8	NA	8.8	21.4305	178078	6523.18	2357.81	21617.2	19306.2	23554.1	96.6105	1522.6	7.27925	2.6544	32.6399	241.281	7.49502	0.932906	28.4651	421.29	31.3679	0.351698
3114	fine_06	3114_1	DG010	3	2.5	2	1	1	TRUE	75.2	-0.87766	75.2	5.29036	532.953	2842.89	2713.6	6045.11	41160.1	1974.78	67.289	320.016	2.67954	0.993486	7.08698	57.6625	0.713453	0.646239	64.75	38.3067	9.20059	0.135964
3114	fine_06	3114_2	DG010	3	10	2	2	4	FALSE	13.3	-0.87766	13.3	17.2067	5198.96	4295.37	3725.51	26684.1	37226.7	4945.72	115.313	740.877	3.97936	2.90694	19.1764	97.1773	0.858232	1.79634	57.8896	79.2243	13.1057	0.239932
3114	fine_06	3114_3	DG010	3	20	2	2	4	FALSE	13.2	-0.87766	13.2	14.1765	4332.66	3248.9	2671.34	32287	35802.7	3926.79	121.697	1072.07	7.07448	2.82861	22.1475	150.379	0.581163	1.87118	55.2259	55.4109	18.0671	0.341954
3114	fine_06	3114_4	DG010	3	30	2	7	10	FALSE	9.2	-0.87766	9.2	8.58428	5327.39	3980.33	2248.47	9992.4	30721.3	5514.85	71.376	1265.82	8.09814	0.834836	19.1222	159.595	1.1779	0.412638	48.332	76.3178	18.2841	0.368019
3114	fine_06	3114_5	DG010	3	40	2	13	19	FALSE	4.7	-0.87766	4.7	18.6208	3150.43	4761.59	3916.54	-6255.13	25679.2	11055	154.291	1410.33	7.84078	0.899527	22.9855	367.761	0.91628	1.16291	71.7002	69.1656	30.592	0.364115
3116	fine_02	3116_1	PI 647906	2	2.5	2	5	8	TRUE	166.7	-0.815837	78.6	9.95153	1554.29	4618.74	2946.61	12068.6	48919.2	3591.54	84.8854	386.41	1.69943	1.21888	8.99337	60.1996	2.35641	0.930384	58.7991	68.7351	14.3967	0.114525
3116	fine_02	3116_2	PI 647906	2	10	2	2	4	TRUE	109.2	-0.815837	109.2	7.33724	7200.58	2543.6	3177.22	5908.46	33940.2	2820.36	112.001	369.242	1.55611	0.888907	10.1189	63.6083	0.900482	0.621465	39.0748	49.4689	11.4478	0.098874
3116	fine_02	3116_3	PI 647906	2	20	2	2	3	TRUE	191.6	-0.815837	86.3	6.43369	9015.49	2961.06	2442.54	10115.1	33400.4	3328.85	66.0458	491.832	2.27223	0.881476	11.0561	93.2473	0.584347	0.436176	45.0521	53.5904	13.9992	0.104828
3116	fine_02	3116_4	PI 647906	2	30	2	7	10	FALSE	30.7	-0.815837	30.7	5.27705	11034.7	2811.69	2274.57	12100	31868.1	3458.66	60.8318	712.601	2.97646	1.30172	18.7958	161.528	0.577184	0.439607	41.4933	53.5233	17.9478	0.147213
3116	fine_02	3116_5	PI 647906	2	40	2	13	19	FALSE	64.4	-0.815837	64.4	4.63526	14315.7	3698	2577.86	13921.3	28969.4	3435.44	48.1484	1613.98	4.69153	0.872397	15.1674	198.359	0.717804	0.534189	40.2592	57.0883	25.2983	0.152018
3134	fine_01	3134_1	PI 647895	2	2.5	2	2	4	TRUE	130.7	-0.218057	79	7.1602	940.482	3787.62	2992.41	18497.2	57930.7	3453.71	103.259	262.982	0.888646	1.01801	8.96707	62.0545	0.740716	0.664008	67.4516	64.9944	13.7392	0.0855679
3134	fine_01	3134_2	PI 647895	2	10	2	2	3	TRUE	200.2	-0.218057	89.7	5.91307	4456.42	2407.52	2275.75	5749.25	42646.4	2368.27	213.667	208.154	1.0262	0.909358	6.86909	52.5325	0.880676	0.489594	42.3151	42.7306	9.14051	0.0741546
3134	fine_01	3134_4	PI 647895	2	30	2	9	13	FALSE	102.2	-0.218057	102.2	4.96669	9428.31	1776.99	2454.32	10592.3	31937.6	2470.14	123.089	588.02	3.90333	1.08194	17.1432	188.257	0.43575	0.307816	48.2965	33.7859	14.6503	0.146235
3134	fine_01	3134_5	PI 647895	2	40	2	13	19	FALSE	17.6	-0.218057	17.6	8.75076	14212.6	4409.8	3051.47	14844.1	34115.4	3290.18	50.5686	960.261	7.3462	1.73719	20.3817	289.274	1.09471	0.712667	46.4759	67.1397	19.1096	0.499741
3135	fine_07	3135_1	DG018	1	2.5	2	4	7	TRUE	176.4	-0.934807	82.7	8.9196	1158.84	4535.31	2767.17	13324.6	39220.8	5086.49	72.1524	302.407	0.731841	0.601572	8.01963	37.4915	0.929232	0.656665	53.0602	99.4615	13.7458	0.07355
3135	fine_07	3135_2	DG018	1	10	2	2	3	TRUE	122.5	-0.934807	122.5	8.69303	7696.92	3177.61	3339.71	6432.1	28876.3	4157.3	308.97	338.272	1.35933	0.889251	9.38174	48.3403	0.898979	0.631893	39.1885	77.5505	10.1066	0.0871017
3135	fine_07	3135_3	DG018	1	20	2	6	9	TRUE	68.2	-0.934807	68.2	8.96209	11772.1	4351.98	2502.12	12915.7	28857.7	7538.65	41.6485	453.347	2.10954	1.08309	13.5746	91.2233	0.694989	0.520723	39.4909	129.438	11.5696	0.109149
3135	fine_07	3135_4	DG018	1	30	2	9	13	FALSE	11.5	-0.934807	11.5	14.8439	16938.5	2638.78	2247.98	8435.09	18616.7	5988.07	68.4759	970.488	1.76826	2.45605	39.9625	157.981	0.772907	0.500543	30.7646	85.5982	20.6613	0.317169
3135	fine_07	3135_5	DG018	1	40	2	13	19	FALSE	1.9	-0.934807	1.9	259.418	7360.11	1836.35	3319.88	-12813.3	11655	4987.04	263.023	906.776	2.27244	0.946601	30.607	128.412	0.718014	1.26574	36.203	57.3915	20.7423	0.148702
3136	fine_07	3136_1	DG014	1	2.5	2	2	4	TRUE	91.5	-0.83388	91.5	9.40205	1314.91	4896.47	3220.8	12209.7	46964.5	4892.59	83.1744	280.877	0.91856	0.727828	9.40648	39.7495	0.63458	0.775374	70.9916	93.739	11.4652	0.0676825
3136	fine_07	3136_3	DG014	1	20	2	8	11	TRUE	43.9	-0.83388	43.9	8.25437	15742.8	2344.73	2355.33	9978.04	24389.2	4341.08	47.4086	406.288	2.60679	1.12384	17.8614	70.201	0.421313	0.555915	37.4495	67.5896	10.9939	0.0964005
3136	fine_07	3136_4	DG014	1	30	2	8	12	FALSE	15.2	-0.83388	15.2	27.5329	11512.4	1754.55	2184.03	11786.4	22342	4110.77	55.4566	603.012	2.04555	1.51698	23.7234	78.6124	0.554482	0.568674	38.0713	56.9648	15.1046	0.105233
3136	fine_07	3136_5	DG014	1	40	2	13	20	FALSE	3.4	-0.83388	3.4	15.6836	54203.5	2174.98	2991.81	15160.5	10703	5408.68	140.038	941.188	2.11628	-0.877177	30.3893	101.69	1.46541	-0.0876693	35.8984	85.3059	17.434	0.193197
3140	fine_06	3140_1	DG009	3	2.5	2	2	4	TRUE	42.3	-0.929078	42.3	5.11419	1018.4	4187.12	3045.89	8609.11	44409.3	3107.81	71.2236	562.99	3.54418	1.24322	9.96302	74.8131	0.773837	1.14635	67.541	55.8075	14.0174	0.178477
3140	fine_06	3140_2	DG009	3	10	2	1	2	FALSE	4.8	-0.929078	4.8	17.2268	2616.74	1766.55	2424.26	41111.4	16486.7	2609.46	115.911	562.597	3.48695	2.91571	15.899	59.0388	0.735995	6.43008	39.485	36.2799	6.12166	0.300469
3140	fine_06	3140_3	DG009	3	20	2	4	7	FALSE	12	-0.929078	12	8.37603	5927.2	3576.47	2196.95	8941.35	28487.5	3342.42	67.9565	887.959	6.80411	1.49546	19.9043	139.476	0.452305	0.582837	41.8259	51.3671	13.8686	0.326269
3140	fine_06	3140_4	DG009	3	30	2	7	10	FALSE	3	-0.929078	3	2.48076	8930.03	3476.23	3246.7	25266.3	32954.9	4705.96	74.9728	1787.58	6.64456	-0.446377	31.4433	210.231	0.659566	0.10624	46.0567	58.1094	23.7115	0.466632
3140	fine_06	3140_5	DG009	3	40	2	13	20	FALSE	2.1	-0.929078	2.1	50.1665	5526.67	6042.26	4490.15	988.83	19920.3	21546.6	202.693	2804.5	16.4843	1.27733	38.0738	1034.41	1.1036	2.55452	61.3772	101.451	24.4814	0.714649
3144	fine_01	3144_1	PI 647913	2	2.5	2	1	1	TRUE	171.5	-0.570845	104.1	5.8169	438.684	2948.07	2877.27	7975.42	44253.5	2534.94	241.446	238.532	0.746247	0.720611	7.41852	51.034	1.76472	0.714685	55.5969	47.7125	12.1047	0.040433
3144	fine_01	3144_2	PI 647913	2	10	2	2	3	TRUE	71.9	-0.570845	71.9	8.49417	4536.73	2708.55	2632.86	9462.95	39716.2	3443.58	84.5344	370.198	1.3449	1.03651	9.22624	76.0643	0.978255	0.766816	41.3916	49.5946	12.2242	0.083319
3144	fine_01	3144_3	PI 647913	2	20	2	5	8	TRUE	179.9	-0.570845	94.8	6.29418	8730.49	2553.35	2117.28	9134.44	33563.9	3416.86	49.541	452.033	1.58827	0.851642	10.44	75.6829	0.645343	0.453563	40.0351	67.8634	12.2335	0.0566901
3144	fine_01	3144_5	PI 647913	2	40	2	13	20	FALSE	23.6	-0.570845	23.6	6.87327	13739.3	3735.61	2709.51	14224.6	32587	3219.92	57.9931	940.363	3.76534	0.783878	15.2401	228.07	0.790851	0.577234	39.1396	58.4828	24.5255	0.173182
3146	fine_21	3146_1	DG033	3	2.5	2	7	10	TRUE	111.3	-0.858041	111.3	8.54655	1300.89	4043.96	3834.12	12501.6	54217.4	3650.45	77.0577	317.076	2.63128	1.38912	11.5882	64.3916	0.703665	0.829926	81.6139	73.1226	13.7471	0.106323
3146	fine_21	3146_2	DG033	3	10	2	1	2	TRUE	99.4	-0.858041	99.4	6.09186	4507.91	1737.74	2222.76	6887.54	27233.4	2270.1	61.163	230.112	2.39195	1.055	10.126	52.1863	0.385111	0.417682	39.9878	39.6397	6.32689	0.0998985
3146	fine_21	3146_3	DG033	3	20	2	2	4	TRUE	47.9	-0.858041	47.9	8.85277	6709.53	2145.91	2664.61	14127.3	35174.8	3534.77	63.1258	426.899	4.2002	1.14621	18.25	110.289	0.437598	0.691573	56.788	54.4268	13.0014	0.0937864
3146	fine_21	3146_4	DG033	3	30	2	7	10	FALSE	15.8	-0.858041	15.8	4.68491	7611.29	1711.7	2685.68	16533.3	34998.1	6485.84	83.3459	475.004	5.68761	1.01773	23.4087	190.631	0.320261	0.446018	58.064	40.3389	14.1938	0.131044
3146	fine_21	3146_5	DG033	3	40	2	12	18	FALSE	7.4	-0.858041	7.4	24.5008	29165.3	3872.59	4090.02	23638.1	41692.2	12740.8	114.94	1200.93	8.38825	2.14872	47.5152	422	0.781115	0.42642	66.8945	111.485	32.822	0.289892
3149	fine_06	3149_1	DG011	3	2.5	2	7	10	TRUE	167	-0.809581	81	5.86388	868.291	3294.23	2600.84	12158.2	46652.8	3202.6	76.6463	435.042	3.27417	1.33479	7.37506	66.3993	0.5943	1.02268	65.5264	60.7272	15.6799	0.125738
3149	fine_06	3149_2	DG011	3	10	2	1	2	TRUE	148.1	-0.809581	106.8	4.30666	3172.98	2533.12	1572.21	5594.03	26659.5	2645.94	52.3961	362.217	3.15003	0.841627	5.38817	60.9513	0.530947	0.29245	28.0147	46.6918	7.13793	0.0893995
3149	fine_06	3149_3	DG011	3	20	2	4	7	TRUE	63.9	-0.809581	63.9	5.05967	5242.99	1861.76	1867	8386.27	27077.2	2765.21	51.0959	552.996	3.96543	0.958607	12.2073	92.3302	0.343614	0.398474	34.7777	37.164	10.3224	0.0852485
3149	fine_06	3149_4	DG011	3	30	2	6	9	FALSE	31.8	-0.809581	31.8	12.2028	10717.3	3444.76	2131.59	12517.1	27860.2	13008.1	63.6914	800.118	6.667	1.24989	15.1173	284.773	1.78171	0.526302	37.2792	120.672	16.0603	0.167753
3149	fine_06	3149_5	DG011	3	40	2	13	20	FALSE	16.2	-0.809581	16.2	14.2796	24955.6	5833.55	2265.89	9022.06	23999.4	6484.11	207.528	1363.94	9.84015	1.62464	16.5616	207.767	3.39486	1.0709	32.4623	153.638	22.98	0.277168
3151	fine_02	3151_1	PI 509021	2	2.5	2	5	8	TRUE	118.1	-0.335309	95.8	9.62161	900.735	3936.39	2957.53	13608.6	45311.5	4390.45	82.3228	523.635	1.47317	1.19769	10.3731	74.5274	0.871494	0.867937	56.0423	73.5306	17.8157	0.0940537
3151	fine_02	3151_2	PI 509021	2	10	2	2	3	TRUE	189	-0.335309	80	7.26395	6638.93	2457.91	2214.48	11465.2	40464.4	2831.33	103.097	317.21	1.67223	0.975867	9.87488	58.9992	0.344557	0.500227	36.8406	41.223	11.4964	0.096795
3151	fine_02	3151_3	PI 509021	2	20	2	4	7	TRUE	45.8	-0.335309	45.8	5.43562	5360.88	2147.17	2401.94	9837.34	30774.9	2325.09	73.6886	536.881	2.88221	1.0556	17.3479	112.421	0.252808	0.394461	34.3403	31.3158	11.2349	0.0734648
3151	fine_02	3151_4	PI 509021	2	30	2	6	9	FALSE	78.5	-0.335309	78.5	7.57072	6182.79	2456.55	2477.14	10957.3	31249.4	6456.01	63.8354	673.151	4.35143	0.978895	17.511	246.734	0.302897	0.43503	38.3834	30.0054	15.7676	0.141037
3151	fine_02	3151_5	PI 509021	2	40	2	12	18	FALSE	50.6	-0.335309	50.6	14.0006	19975	5331.28	4677.12	23761.2	49371.3	19468.7	128.599	1438.91	11.0073	1.85837	38.6656	906.124	2.17041	0.775377	57.2921	97.9632	36.9497	0.389765
3164	fine_01	3164_1	PI 647902	2	2.5	2	3	6	TRUE	128.3	0.893998	84.6	5.19514	786.321	2874.45	2099.52	9815.34	43331.5	3244.62	167.336	260.235	1.01967	1.02844	6.18319	57.1714	1.05225	0.727876	50.3408	48.8966	8.8773	0.0636087
3164	fine_01	3164_3	PI 647902	2	20	2	3	5	TRUE	201	0.893998	82.3	4.81538	7208.73	2445.99	2636.01	7951.72	36561.1	2422.53	55.5867	299.386	1.80714	0.156386	9.512	75.0224	0.364758	0.176875	40.7459	40.8859	8.12835	0.0329645
3164	fine_01	3164_4	PI 647902	2	30	2	7	10	FALSE	243	0.893998	78	3.6799	8743.35	1854.09	2571.91	8634.87	36908.3	2228.91	61.2788	269.195	1.69576	0.664238	10.4781	80.3417	0.331507	0.294223	49.5288	36.4784	11.1376	0.0716673
3164	fine_01	3164_5	PI 647902	2	40	2	13	19	FALSE	16.2	0.893998	16.2	27.0195	19666.8	2910.38	2652.28	-1355.97	21482.8	6479.68	1306.71	296.594	2.95018	0.64768	12.2008	119.269	4.20355	0.672009	31.4032	153.944	10.4432	0.307373
3165	fine_12	3165_1	PI 403999	2	2.5	2	3	6	TRUE	133.5	-0.737828	87.1	4.5609	769.979	3038.29	2467.43	7664.13	49351.2	3162.79	65.2714	189.87	1.08549	1.00674	6.0282	38.9714	1.04617	0.534651	65.019	67.5348	8.69897	0.0469822
3165	fine_12	3165_2	PI 403999	2	10	2	2	3	TRUE	52.9	-0.737828	52.9	6.94559	5223.75	3523.26	2892.09	12471.2	40343.7	4000.82	105.721	330.921	2.06482	1.43605	10.9124	64.8491	0.882716	0.723549	42.4514	74.2717	9.18441	0.0613452
3165	fine_12	3165_3	PI 403999	2	20	2	3	6	TRUE	27.6	-0.737828	27.6	7.56976	5826.21	1958.35	2448.11	5722.03	28888.1	3163.97	67.8473	398.284	1.52717	-0.563946	16.2282	73.4222	0.457351	0.310241	42.7983	46.4899	9.50815	0.040389
3165	fine_12	3165_4	PI 403999	2	30	2	8	11	FALSE	35	-0.737828	35	6.41343	8303.64	2334.97	2343.97	10820.9	28114.7	3233.79	68.1954	530.501	2.45268	0.872865	19.6916	133.736	0.449955	0.416537	43.7856	44.7744	11.3182	0.071051
3165	fine_12	3165_5	PI 403999	2	40	2	12	18	FALSE	17.5	-0.737828	17.5	11.3245	16595.1	4155.6	4145.25	16738.7	49096.7	8224.28	107.732	1338.86	5.60481	1.69309	35.0128	284.907	0.682281	0.573975	82.0155	83.2728	24.2495	0.194805
3177	fine_01	3177_1	PI 647897	2	2.5	2	1	1	TRUE	111.4	1.20377	111.4	4.76822	814.46	3081.9	2787.12	7323.3	45302	2808.1	162.815	189.909	1.30769	0.860443	5.27608	38.6012	1.33235	0.43867	56.3504	60.8145	9.489	0.0490245
3177	fine_01	3177_2	PI 647897	2	10	2	1	2	TRUE	201	1.20377	85.9	3.4895	4908.45	2036.71	1882.95	6269.8	33914.4	2088.22	192.151	151.18	0.951807	0.758127	5.5677	39.0194	0.967988	0.475207	33.2549	44.503	6.70622	0.0525061
3177	fine_01	3177_3	PI 647897	2	20	2	7	10	TRUE	213.8	1.20377	80.5	6.3862	7837.22	1756.93	2529.83	9919.82	31922.5	3120.1	63.7753	367.86	0.989213	0.671248	10.4205	76.5965	0.584265	0.346889	40.7586	40.8352	12.0311	0.0885185
3177	fine_01	3177_5	PI 647897	2	40	2	12	18	FALSE	82.5	1.20377	82.5	9.14731	25389.4	3322.29	4974.03	17629.8	44673.3	6507.28	785.098	890.857	3.97462	1.33058	26.0305	345.32	1.18708	0.70363	60.7558	69.4646	31.5272	0.214321
3181	fine_14	3181_1	PI 614678	3	2.5	2	5	8	TRUE	192.6	-0.622015	87.3	5.89529	739.871	3341.49	2861.01	9495.09	52443.5	2036.6	67.2747	283.064	1.48817	0.813432	7.13903	61.2652	0.901222	0.655398	61.5028	39.1931	12.0557	0.0778405
3181	fine_14	3181_5	PI 614678	3	40	2	13	19	FALSE	93.9	-0.622015	93.9	9.55468	17140.9	2119.02	2848.89	10518.9	35577.2	2728.56	59.9504	810.042	2.43305	0.687377	13.7448	119.375	0.737897	0.485212	47.8431	52.6473	18.9441	0.0742352
3182	fine_01	3182_1	PI 647893	2	2.5	2	3	6	TRUE	231.9	-0.482536	83.4	6.59322	776.233	3530.42	2887.33	11285.7	52390.5	2850.03	399.951	305.678	1.5931	0.984149	7.91221	63.5408	1.5568	1.09097	61.5872	59.9467	10.9181	0.0619459
3182	fine_01	3182_3	PI 647893	2	20	2	6	9	TRUE	182.1	-0.482536	78.6	5.63065	5827.7	1879.46	2404.99	8830.73	33178.2	4558.4	53.0477	314.772	1.55696	0.820725	10.8244	119.786	0.362766	0.379131	38.3465	27.5159	9.48333	0.0644423
3182	fine_01	3182_4	PI 647893	2	30	2	9	13	FALSE	120	-0.482536	76	5.79906	9543.65	1996.49	2672.5	10167	33128.3	2299.74	56.137	453.545	2.9417	1.04413	15.7539	153.538	0.457076	0.350124	42.7796	30.3285	15.2214	0.0776839
3182	fine_01	3182_5	PI 647893	2	40	2	13	20	FALSE	80.7	-0.482536	80.7	5.91717	28267.7	2769.98	2652.08	9709.33	30672.6	4109.41	110.321	500.18	2.91892	0.839638	13.3114	130.579	1.25999	0.521975	37.3902	91.792	17.0581	0.0762442
3185	fine_10	3185_1	PI 364836	2	2.5	2	4	7	TRUE	256.3	-0.753024	90.1	6.49018	699.306	2986.5	2422.67	10098.5	46460.1	2614.56	205.926	224.756	0.968466	0.836698	5.56457	42.6292	1.57218	0.908306	58.3553	56.7589	11.2351	0.056406
3185	fine_10	3185_2	PI 364836	2	10	2	4	7	TRUE	198.7	-0.753024	93.3	5.76731	3838	2060.15	2069.21	7501.38	38920.9	2321.72	301.056	207.228	0.999552	1.08988	6.10861	46.7227	0.775863	0.575245	40.6542	45.1425	8.82507	0.0379097
3185	fine_10	3185_3	PI 364836	2	20	2	5	8	TRUE	188.1	-0.753024	96	5.3562	4671.94	1797.99	2310.58	8355.15	35505.6	2362.04	53.6492	334.666	1.33665	0.901638	10.686	74.2234	0.337238	0.425905	43.5761	36.0463	10.7977	0.0347477
3185	fine_10	3185_4	PI 364836	2	30	2	3	5	FALSE	63.3	-0.753024	63.3	7.11689	6892.18	2218.4	2483.53	8898.38	35262.1	2493.16	159.385	521.256	1.93291	0.862061	14.8581	134.023	0.554106	0.468786	48.3628	39.4446	17.3365	0.0551904
3185	fine_10	3185_5	PI 364836	2	40	2	13	19	FALSE	59.5	-0.753024	59.5	13.7336	26397.9	2861.22	2391.9	10588.6	27499.6	4246.95	187.881	657.046	4.10136	1.04246	15.942	162.676	1.43522	0.533653	36.4049	96.4238	18.1559	0.117306
3186	fine_07	3186_1	DG015	1	2.5	2	4	7	TRUE	71	-0.795775	71	8.72616	924.518	4000.88	2863.32	11894.1	45753.5	4464.82	83.0337	162.309	0.817344	0.692428	6.88418	30.3923	1.27529	0.712194	73.1382	103.254	12.7924	0.0517514
3186	fine_07	3186_2	DG015	1	10	2	2	4	TRUE	63.9	-0.795775	63.9	8.11293	7818.51	3268.9	2848.46	12348.2	36891.5	4239.43	71.6634	184.903	0.952728	1.00709	10.5443	46.7244	0.461479	0.676812	37.3596	78.5879	7.56956	0.0546061
3186	fine_07	3186_3	DG015	1	20	2	4	7	FALSE	4.8	-0.795775	4.8	6.42952	11452.1	2652.1	3038.32	4677.03	30260.1	3937.61	115.361	445.726	1.20296	1.24484	21.2394	73.129	0.683004	0.256989	37.3304	76.4796	11.6741	0.0338857
3186	fine_07	3186_4	DG015	1	30	2	3	6	FALSE	14.5	-0.795775	14.5	6.42253	6032.66	1242.66	1394.73	-6868.53	10890.5	2417.96	32.9356	222.778	0.674237	-3.3971	8.56939	32.9126	0.312174	-1.01927	17.7755	34.06	9.28928	0.00562233
3186	fine_07	3186_5	DG015	1	40	2	13	19	FALSE	5.9	-0.795775	5.9	60.8827	45844.2	4658.03	2907.11	14677.9	13152.8	9231.61	105.398	618.653	2.31984	1.39005	15.9279	68.907	1.6966	0.243457	43.4861	201.031	18.1824	0.0956336
3197	fine_01	3197_1	PI 647899	2	2.5	2	2	4	TRUE	163.6	-0.192543	88.4	7.49541	961.309	3430.29	3456.01	8229.14	47795.5	3782.7	313.546	344.532	0.983746	1.04782	7.28627	55.4818	1.57542	0.765557	64.3266	77.8565	10.6494	0.0822849
3197	fine_01	3197_2	PI 647899	2	10	2	2	3	TRUE	207	-0.192543	78.8	6.87746	5111.24	3635.34	2359.81	9696.35	38681.6	4056.38	137.299	393.501	1.00681	1.07751	8.42916	63.1756	1.49445	0.551675	37.3192	78.4284	10.0748	0.0857055
3197	fine_01	3197_3	PI 647899	2	20	2	2	3	TRUE	193.3	-0.192543	83.6	4.74344	6212.57	2075.91	2473.66	9158.98	33366.2	2277.87	53.4903	310.101	1.32841	0.785631	10.9729	78.4851	0.399838	0.367138	36.3406	36.5414	8.74467	0.0552835
3197	fine_01	3197_4	PI 647899	2	30	2	8	11	FALSE	132.1	-0.192543	72.8	4.64811	9851.37	1867.64	2388.67	8712.69	26835.9	2735.36	150.579	470.858	2.31491	0.614571	13.7159	148.076	0.507613	0.363902	33.8712	43.4826	13.5781	0.0735262
3204	fine_15	3204_1	PI 614679	2	2.5	2	2	4	TRUE	95.4	-0.451782	95.4	7.0902	1009.6	3376.26	4539.31	5169.77	41148.1	3767.93	81.9239	306.16	1.20404	0.6747	8.82314	49.2104	1.94526	1.21422	52.7642	70.7555	11.3423	0.0790186
3204	fine_15	3204_2	PI 614679	2	10	2	1	2	TRUE	67.7	-0.451782	67.7	5.36762	4777.82	1925.6	1501.97	10752.2	28849.8	2808.74	77.5137	236.146	1.30199	0.993255	8.24812	41.5743	0.237564	0.549407	29.4963	43.6915	5.90376	0.0584792
3204	fine_15	3204_3	PI 614679	2	20	2	5	8	TRUE	51.5	-0.451782	51.5	7.0144	6323.36	3206.19	2764.59	9398.08	27248.6	4175.52	68.3602	401.283	1.87386	0.829892	13.0814	94.946	0.782886	0.547863	33.4192	77.8804	9.45437	0.0613889
3204	fine_15	3204_4	PI 614679	2	30	2	8	11	FALSE	52.3	-0.451782	52.3	7.81487	19516.2	2229.89	2980.01	10354	22353.8	4110.59	183.182	570.712	1.73403	0.688002	16.3336	141.907	0.687851	0.494459	30.0381	57.9337	13.2924	0.0844927
3204	fine_15	3204_5	PI 614679	2	40	2	13	19	FALSE	4.3	-0.451782	4.3	77.4338	4625.09	3201.3	4460.2	1803.59	21470.7	4946.16	228.889	794.155	1.00759	1.70072	20.5281	111.796	0.941683	0.92784	62.4646	77.2244	23.5606	0.137936
3207	fine_19	3207_1	PI 647923	3	2.5	2	4	7	TRUE	167.3	-0.855947	78.5	9.75922	1111.18	4672.34	2822.91	11259.2	39015.5	5494.13	69.5412	324.91	1.38471	1.15061	8.38657	49.6506	1.43238	0.889026	56.4583	88.2891	13.1132	0.0650724
3207	fine_19	3207_4	PI 647923	3	30	2	8	11	FALSE	24.1	-0.855947	24.1	8.5725	16709.6	2156.12	2065.03	10149.1	20842.9	5494.56	61.4361	573.646	2.69094	1.57579	24.1851	150.927	0.532906	0.5251	30.0837	50.1188	10.8124	0.09877
3207	fine_19	3207_5	PI 647923	3	40	2	13	19	FALSE	14.4	-0.855947	14.4	26.3581	32269.2	6637.26	1937.57	8453.76	6630.43	7212.33	66.0714	769.727	3.73468	1.39318	20.8213	140.342	3.37054	0.853936	19.6168	176.804	11.1904	0.252927
3209	fine_04	3209_1	PI 647891	3	2.5	2	3	6	TRUE	188.1	-0.594365	80.7	7.1483	977.084	3338.14	3229.17	12762.7	50358.5	4809.9	107.174	290.36	0.884647	0.442995	7.64483	71.5731	0.694144	1.15301	60.8418	60.3647	12.5203	0.0394642
3209	fine_04	3209_1	PI 647891	3	2.5	2	3	6	TRUE	188.1	-0.594365	80.7	7.1483	977.084	3338.14	3229.17	12762.7	50358.5	4809.9	107.174	290.36	0.884647	0.442995	7.64483	71.5731	0.694144	1.15301	60.8418	60.3647	12.5203	0.0394642
3209	fine_04	3209_2	PI 647891	3	10	2	1	2	TRUE	186.4	-0.594365	115.2	6.74038	5943.97	2073.56	1788.57	6967.54	26906.3	3059.86	58.1213	271.024	0.723433	0.527781	5.92643	41.9957	0.482104	0.362094	24.9633	50.0305	8.1487	0.0340212
3209	fine_04	3209_2	PI 647891	3	10	2	1	2	TRUE	186.4	-0.594365	115.2	6.74038	5943.97	2073.56	1788.57	6967.54	26906.3	3059.86	58.1213	271.024	0.723433	0.527781	5.92643	41.9957	0.482104	0.362094	24.9633	50.0305	8.1487	0.0340212
3209	fine_04	3209_3	PI 647891	3	20	2	3	6	TRUE	162.2	-0.594365	93.3	6.33693	4955.86	1640.69	1765.49	8269.64	23557.2	3401.81	47.8574	459.951	1.44352	0.106364	10.8795	68.5483	0.293613	0.393889	29.7401	37.6731	12.0125	0.0376474
3209	fine_04	3209_3	PI 647891	3	20	2	3	6	TRUE	162.2	-0.594365	93.3	6.33693	4955.86	1640.69	1765.49	8269.64	23557.2	3401.81	47.8574	459.951	1.44352	0.106364	10.8795	68.5483	0.293613	0.393889	29.7401	37.6731	12.0125	0.0376474
3209	fine_04	3209_4	PI 647891	3	30	2	8	11	FALSE	76.3	-0.594365	58.7	9.71248	4929.73	3533.85	3760.97	18038.7	38754.5	7392.26	101.437	897.112	4.58814	1.24277	25.2213	209.029	0.897721	0.586976	65.0802	85.3014	34.054	0.110837
3209	fine_04	3209_4	PI 647891	3	30	2	8	11	FALSE	76.3	-0.594365	58.7	9.71248	4929.73	3533.85	3760.97	18038.7	38754.5	7392.26	101.437	897.112	4.58814	1.24277	25.2213	209.029	0.897721	0.586976	65.0802	85.3014	34.054	0.110837
3209	fine_04	3209_4	PI 647891	3	30	2	8	11	FALSE	76.3	-0.594365	76.3	9.71248	4929.73	3533.85	3760.97	18038.7	38754.5	7392.26	101.437	897.112	4.58814	1.24277	25.2213	209.029	0.897721	0.586976	65.0802	85.3014	34.054	0.110837
3209	fine_04	3209_4	PI 647891	3	30	2	8	11	FALSE	76.3	-0.594365	76.3	9.71248	4929.73	3533.85	3760.97	18038.7	38754.5	7392.26	101.437	897.112	4.58814	1.24277	25.2213	209.029	0.897721	0.586976	65.0802	85.3014	34.054	0.110837
3209	fine_04	3209_5	PI 647891	3	40	2	12	18	FALSE	16.9	-0.594365	16.9	14.5364	47510.9	5355.74	4042.87	15420.6	37687.6	29458.7	98.2671	1702.67	9.591	2.57663	42.6752	1051.81	1.24665	0.406309	52.4297	123.495	39.1406	0.333559
3209	fine_04	3209_5	PI 647891	3	40	2	12	18	FALSE	16.9	-0.594365	16.9	14.5364	47510.9	5355.74	4042.87	15420.6	37687.6	29458.7	98.2671	1702.67	9.591	2.57663	42.6752	1051.81	1.24665	0.406309	52.4297	123.495	39.1406	0.333559
3211	fine_01	3211_1	PI 647912	2	2.5	2	4	7	FALSE	143.5	-0.494077	80.4	18.5065	1049.75	4766.62	2764.28	14022.9	46699.3	7442.4	908.849	356.808	4.324	2.12135	8.76413	62.7246	5.72724	1.716	54.3668	164.282	22.659	0.13097
3211	fine_01	3211_2	PI 647912	2	10	2	1	2	TRUE	201	-0.494077	106.1	3.78706	3840.37	1930.2	1784.23	5542.79	27917.1	1720.76	53.9269	190.569	1.45649	0.838934	5.12594	43.2375	0.594827	0.346412	30.9616	33.4242	6.04963	0.0543681
3211	fine_01	3211_3	PI 647912	2	20	2	6	9	TRUE	81	-0.494077	81	7.04306	6246.8	2078.95	2625.25	9270.76	32250.5	2827.31	101.396	402.763	2.3507	1.06713	12.8433	91.3372	0.870221	0.507663	44.0983	43.3904	12.5085	0.0982625
3211	fine_01	3211_4	PI 647912	2	30	2	8	11	FALSE	72.6	-0.494077	72.6	5.4018	14508.8	1438.19	2307.04	7833.54	27886.2	3720.71	109.672	326.315	2.12284	0.933627	13.1123	146.159	0.652678	0.376027	43.7878	44.0608	13.8528	0.0720848
3211	fine_01	3211_5	PI 647912	2	40	2	13	19	FALSE	24.7	-0.494077	24.7	17.3887	16199.2	1787.64	2967.88	4811.55	29484.5	2344.7	292.782	340.274	2.26486	0.928562	12.3287	108.448	0.862989	0.298699	44.4846	48.6642	15.3891	0.0747903
3215	fine_03	3215_1	PI 509022	3	2.5	2	3	6	TRUE	265.2	-0.965309	87.7	7.12443	998.977	4258.47	2585.21	8753.12	41631.5	5194.12	354.657	353.858	1.0764	0.0917031	6.45691	50.498	1.54821	0.884031	50.8954	102.551	10.2029	0.0413181
3215	fine_03	3215_2	PI 509022	3	10	2	1	2	TRUE	70.8	-0.965309	70.8	15.3264	4700.21	3092.92	1945.71	7206.08	16443.2	5922.82	93.8741	316.418	2.29299	1.09032	8.62507	42.5712	4.2245	0.465653	20.9105	114.305	11.0694	0.0792381
3215	fine_03	3215_3	PI 509022	3	20	2	3	5	TRUE	46.3	-0.965309	46.3	9.71468	6536.32	1969.65	2271.78	6753.7	21242	3858.79	85.081	526.036	2.0062	0.646296	14.9492	81.5802	0.547034	0.399813	27.1822	51.0302	10.0936	0.0763145
3215	fine_03	3215_4	PI 509022	3	30	2	8	11	FALSE	9.2	-0.965309	9.2	10.1543	11193.2	1433.73	2233.41	5602.29	19217.3	1631.82	108.028	508.695	0.968407	1.12112	21.0902	95.9729	0.328991	0.531092	28.3509	29.8647	10.8814	0.0830584
3215	fine_03	3215_5	PI 509022	3	40	2	13	19	FALSE	15.8	-0.965309	15.8	29.302	55572.8	4036.9	2097.6	2582.92	7838.55	8402.15	107.137	722.016	2.14496	1.23967	13.848	100.677	2.483	0.629428	22.7295	186.033	13.8472	0.115747
3227	fine_08	3227_1	DG023	3	2.5	2	1	1	TRUE	65.7	-0.575342	65.7	9.83385	603.008	2941.18	1702.1	10394	38737.2	3197.68	59.3962	157.075	1.06114	0.652684	5.75111	28.2264	0.631193	0.480152	62.9177	66.9241	9.06509	0.0458982
3227	fine_08	3227_2	DG023	3	10	2	2	3	TRUE	34.1	-0.575342	34.1	12.8741	6754.44	2960.72	2872.75	16729.5	30699.1	3829.27	80.8375	280.117	1.0271	1.63506	16.5627	52.7443	0.983504	1.00606	41.3352	62.3505	13.2771	0.118426
3227	fine_08	3227_3	DG023	3	20	2	2	4	FALSE	8.2	-0.575342	8.2	12.1508	4697.18	1814.31	2866.05	73018.7	34899.5	2265.57	122.848	261.425	1.4182	4.5201	25.1842	70.1118	0.458176	2.58935	56.6927	32.4553	12.0626	0.07594
3227	fine_08	3227_4	DG023	3	30	2	8	11	FALSE	27.9	-0.575342	27.9	11.6445	10979.4	1857.23	2424.34	11557.6	20935.1	2295.32	59.7975	485.644	2.8498	1.11652	28.744	122.156	0.575625	0.615314	35.5796	32.2754	25.7743	0.112992
3228	fine_05	3228_1	DG004	3	2.5	2	4	7	TRUE	92	-0.434783	92	5.86813	1029.21	3966.75	2975.54	9898.32	44597.9	3689.73	92.1535	405.36	1.17153	0.720476	8.33531	58.3128	1.0341	0.849982	64.8337	75.3552	13.0391	0.0644431
3228	fine_05	3228_2	DG004	3	10	2	2	3	TRUE	73.8	-0.434783	73.8	6.94514	6271.96	3049.47	2818.88	9408.94	31559.6	3439.87	84.0521	464.674	1.01645	0.817509	8.89753	65.7697	0.771842	0.614682	37.2265	58.3663	10.9565	0.0643335
3228	fine_05	3228_3	DG004	3	20	2	2	4	TRUE	73.8	-0.434783	73.8	8.57114	5747.07	1771.22	2367.97	6780.01	22199.4	2610.94	54.9855	588.529	1.43027	0.716139	11.2226	77.1473	0.552178	0.374586	33.1616	34.7188	11.27	0.080168
3228	fine_05	3228_5	DG004	3	40	2	13	20	FALSE	9.7	-0.434783	9.7	11.0491	9842.89	4140.32	2860.77	11311.4	38451.6	6714	110.531	868.791	2.22437	-0.735074	16.1645	238.199	0.680283	0.899255	46.8031	67.255	24.0875	0.205147
6019	fine_10	6019_1	PI 364836	2	2.5	3	8	11	TRUE	47.4	-0.278481	47.4	4.67766	857.719	3152.93	3105.06	9160.23	44076.8	2464.41	103.768	261.502	1.3943	0.897191	9.60009	69.9568	0.659426	0.552638	63.4842	43.6462	7.57269	0.0881581
6019	fine_10	6019_2	PI 364836	2	10	3	2	3	TRUE	43.7	-0.278481	43.7	4.51243	8875.2	2433.42	3257.92	6042.32	30550.2	2957.04	108.372	295.174	1.31568	1.33133	12.7401	79.0947	0.771413	0.376767	48.666	55.0418	5.89872	0.0900758
6019	fine_10	6019_3	PI 364836	2	20	3	4	7	TRUE	24	-0.278481	24	4.39333	10326	2033.69	2657.42	7671.48	28957.9	2652.64	332.091	415.839	1.10376	0.927718	15.9204	85.3483	0.635464	0.277264	42.7527	42.1989	8.18998	0.197764
6019	fine_10	6019_4	PI 364836	2	30	3	8	11	FALSE	34.2	-0.278481	34.2	5.60885	21027.7	1626.39	2344.3	7932.21	21830.8	2475.42	82.7966	417.965	1.5243	0.701646	18.6258	112.596	0.385647	0.273393	33.8841	35.1609	10.7529	0.167006
6019	fine_10	6019_5	PI 364836	2	40	3	13	19	FALSE	14.1	-0.278481	14.1	44.4472	47441.7	2245.72	2399.87	8783.49	9522.25	4115.9	115.201	654.506	1.82375	0.876355	22.0483	157.601	0.882771	0.37495	32.9932	66.7651	14.9987	0.334997
6026	fine_01	6026_1	PI 647921	2	2.5	3	8	11	TRUE	44.5	-0.878652	44.5	6.2679	1466.04	2946.68	3062.34	8901.56	40482.1	2376.83	255.277	293.206	1.96007	1.02149	11.9957	51.7556	0.889131	0.676954	56.4564	43.622	9.61734	0.0884251
6026	fine_01	6026_2	PI 647921	2	10	3	2	3	TRUE	56.1	-0.878652	56.1	7.08081	6454.27	3393.96	3383.41	8554.82	37435.3	3384.08	86.5211	323.284	2.47969	1.41022	12.9172	72.4145	1.32968	0.537912	56.8715	66.6912	8.16709	0.141522
6026	fine_01	6026_3	PI 647921	2	20	3	5	8	FALSE	9.6	-0.878652	9.6	6.0356	8330.52	1647.49	2730.03	8120.45	28747.8	2354.55	93.5474	416.365	2.65031	1.79044	20.807	79.8078	0.573099	0.226034	43.4724	46.8567	8.31031	0.235529
6026	fine_01	6026_4	PI 647921	2	30	3	9	13	FALSE	5.4	-0.878652	5.4	16.8229	29657.1	2501.96	2747.18	3843.52	23409.3	4180.76	62.5665	1151.85	6.83249	2.53797	48.5736	249.71	1.13858	0.628866	38.1102	74.8261	16.479	0.679626
6027	fine_07	6027_1	DG016	1	2.5	3	8	11	TRUE	48.9	-0.940695	48.9	9.54928	2343.24	3216.14	2755.07	10986.9	34435.9	4423.89	54.4587	476.001	2.91892	1.78348	14.2942	59.8354	0.413837	0.852131	52.3957	71.9188	10.9781	0.113585
6027	fine_07	6027_2	DG016	1	10	3	2	3	TRUE	28.3	-0.940695	28.3	9.57233	7275.31	3073.14	3172.23	4900.38	27070	4325.38	91.9625	414.994	3.54499	2.31281	16.4808	62.1058	0.825201	0.737193	42.8686	82.6488	7.00126	0.117987
6027	fine_07	6027_3	DG016	1	20	3	5	8	FALSE	12.2	-0.940695	12.2	11.7871	18184.6	2319.97	2088.88	8131.92	22809	4891.09	56.8516	381.119	4.23854	1.98976	15.9445	60.6001	0.870773	0.237027	34.2827	93.3352	6.1442	0.0914933
6027	fine_07	6027_4	DG016	1	30	3	8	11	FALSE	2.9	-0.940695	2.9	24.4731	12846.8	2619.45	2885.27	11825.1	24999.5	69402.3	151.247	675.74	4.63845	2.80747	35.9588	1403.41	0.995445	0.610051	39.4814	57.6806	8.72381	0.212225
6030	fine_07	6030_1	DG015	1	2.5	3	8	11	FALSE	14.1	-0.560284	14.1	12.981	3671.31	3207.48	3080.99	9903.64	32550.5	4502.91	54.9761	553.279	1.7077	1.584	25.2786	68.1861	0.656856	1.17219	42.9223	81.3181	13.6919	0.152036
6030	fine_07	6030_2	DG015	1	10	3	1	2	TRUE	23.1	-0.560284	23.1	9.46605	7170.53	2263.15	1931.46	11794.3	9654.23	3959.62	71.7562	360.588	3.6843	2.00496	15.6705	69.1033	0.494865	1.237	22.9126	73.7138	5.61665	0.140982
6030	fine_07	6030_3	DG015	1	20	3	5	8	FALSE	8.5	-0.560284	8.5	8.51903	14842.5	2680.29	2489.01	9483.16	19711	5174.09	70.9322	459.186	3.04161	2.20918	25.0248	77.9543	0.887455	0.135575	27.469	93.7874	7.86397	0.142353
6030	fine_07	6030_4	DG015	1	30	3	3	5	FALSE	6.2	-0.560284	6.2	13.5531	14471.1	2452.95	2144.64	53.0416	17223.7	4673.62	123.368	627.574	2.56595	-4.79374	34.9814	146.763	0.836485	-0.884765	26.7874	61.6538	17.7387	0.182622
6032	fine_06	6032_1	DG010	3	2.5	3	8	12	FALSE	7.3	-0.575342	7.3	47.5131	4077.58	2747.81	2635.41	16309.1	38769.2	1710.23	80.505	349.379	1.52867	0.914909	12.4427	48.0185	0.418304	0.652792	54.4638	47.8125	7.97121	0.179668
6032	fine_06	6032_2	DG010	3	10	3	2	3	FALSE	10.4	-0.575342	10.4	11.2425	7300.26	3518.48	2406.46	60047.4	36038	3566.98	136.759	398.381	1.97726	4.39901	12.5903	61.992	0.350885	1.82569	49.5787	63.3378	5.93059	0.17818
6032	fine_06	6032_3	DG010	3	20	3	5	8	FALSE	5.9	-0.575342	5.9	5.87796	10367.5	3216.34	2622.94	9496.88	28310.9	3859.74	114.886	493.384	1.66786	1.44306	15.7889	72.2177	0.91215	0.328867	39.6083	75.4645	7.76174	0.23854
6036	fine_12	6036_1	PI 403999	2	2.5	3	8	11	FALSE	9.8	-0.642857	9.8	15.0918	9693.4	2539.75	2943.21	10773.7	32926.4	1916.42	85.9906	730.929	3.6955	2.22061	23.2235	112.818	0.73105	1.25023	48.7933	40.8109	10.1526	0.164302
6036	fine_12	6036_2	PI 403999	2	10	3	1	2	FALSE	6	-0.642857	6	16.2387	7980.53	4094.47	3462.65	41198.9	24475.5	4960.15	197.183	884.499	7.09314	5.13086	34.9927	208.645	1.17833	3.85528	60.9854	92.2804	6.35616	0.812322
6036	fine_12	6036_3	PI 403999	2	20	3	6	9	FALSE	5	-0.642857	5	23.5278	14103.5	4034.52	2709.28	17445.9	30988.1	61532.2	179.934	980.539	7.83566	5.80678	48.1608	1485.22	0.768895	1.05704	45.8953	68.9296	13.1893	0.535167
6038	fine_15	6038_1	PI 614679	2	2.5	3	7	10	TRUE	90.5	-0.769061	90.5	9.84054	1187.14	3407.38	3560.68	10388.7	50489.4	3664.27	95.101	258.68	1.49757	0.589539	10.6657	48.238	0.884049	1.0096	53.9151	69.6052	11.2527	0.0694854
6038	fine_15	6038_2	PI 614679	2	10	3	2	3	TRUE	30.6	-0.769061	30.6	6.72444	6519.62	2228.02	4940.29	7402.22	26368.3	3996.89	90.4659	274.89	1.25088	1.34828	18.5888	62.4145	1.33951	0.614821	34.5784	51.003	6.86351	0.0672079
6038	fine_15	6038_3	PI 614679	2	20	3	4	7	TRUE	18.3	-0.769061	18.3	7.30788	9130.9	1766.23	3021.8	6781.92	23839.7	2909.55	91.4475	329.509	2.14846	1.01375	20.4577	72.9304	0.564354	0.529762	28.1131	40.8666	7.00381	0.115601
6039	fine_07	6039_1	DG018	1	2.5	3	8	11	TRUE	38.2	-0.86911	38.2	8.59923	2868.59	3545.02	2880.29	11073.7	34851.2	6317.35	55.7408	477.651	2.93703	1.22581	17.8265	110.611	0.586847	0.780611	51.4792	67.5312	12.8939	0.121176
6039	fine_07	6039_2	DG018	1	10	3	1	2	TRUE	22.2	-0.86911	22.2	9.68003	6677.25	2049.96	2253.44	12050.7	13834.4	2895.3	79.8536	242.929	1.77326	1.76019	14.1694	45.3185	0.357654	1.13824	35.6274	46.6447	4.79001	0.0903029
6039	fine_07	6039_3	DG018	1	20	3	5	8	FALSE	10	-0.86911	10	12.581	11598.1	1772.22	2588.62	9167.64	21605.5	2824.79	88.4232	379.146	1.02101	1.46997	20.2765	57.7485	0.531445	0.202695	35.0627	40.3711	8.87035	0.116272
6039	fine_07	6039_4	DG018	1	30	3	8	12	FALSE	5	-0.86911	5	62.1898	8984.36	1284.6	2560.79	19115.6	24136.9	2575.07	70.7696	302.831	1.45376	1.64255	17.7428	125.604	0.251393	0.406795	42.3589	17.6424	8.42601	0.108763
6045	fine_06	6045_1	DG011	3	2.5	3	7	10	TRUE	103.8	-0.852601	103.8	3.5599	688.455	3881.76	2340.2	10742.6	43625.3	3101.71	69.7473	520.895	1.53345	0.718956	9.47225	80.9326	0.315741	0.622284	61.8301	39.1807	7.24698	0.0734828
6045	fine_06	6045_2	DG011	3	10	3	1	2	TRUE	93.7	-0.852601	93.7	3.71176	5619.71	1799.16	1488.21	6552.33	19735.5	1783.31	58.3994	255.467	0.847903	0.470635	7.49086	61.058	0.188143	0.270721	23.7626	18.8149	3.50468	0.0393082
6045	fine_06	6045_3	DG011	3	20	3	4	7	FALSE	1.5	-0.852601	1.5	-6.70052	11254.1	4277.38	5644.03	9825.87	61059.4	4343.54	317.365	942.035	3.71865	3.2456	36.3627	165.542	1.53093	0.408315	79.9735	88.0216	14.6463	0.0520901
6045	fine_06	6045_4	DG011	3	30	3	8	12	FALSE	15.3	-0.852601	15.3	9.20634	43381.9	2247.31	1561.22	9742	16558.6	3699.42	98.2203	637.054	3.02224	1.57777	18.627	164.911	0.438858	0.517038	19.9807	41.4218	10.71	0.126438
6045	fine_06	6045_5	DG011	3	40	3	14	21	FALSE	4.7	-0.852601	4.7	6.53329	18216.3	3326.91	3722.46	8923.26	17410.1	6382.43	126.902	898.445	2.89031	0.362889	22.2181	192.306	0.497071	0.0215907	44.3885	45.4749	12.7888	0.140331
6046	fine_01	6046_1	PI 647908	2	2.5	3	8	11	TRUE	20.7	-0.555556	20.7	6.46405	2535.03	3414.06	2733.79	8222.47	35559.7	2201.6	77.6431	616.18	3.34405	1.56772	14.9805	109.301	0.584349	0.698807	49.8655	37.768	10.0569	0.153905
6046	fine_01	6046_2	PI 647908	2	10	3	2	3	TRUE	26.5	-0.555556	26.5	8.40061	8354.78	3544.32	2553.03	18436.9	31917.8	4072.83	112.331	543.808	4.19633	2.34315	17.3898	107.626	0.817627	0.700922	45.3401	82.3702	6.12324	0.242083
6046	fine_01	6046_3	PI 647908	2	20	3	6	9	FALSE	8.1	-0.555556	8.1	9.81692	10771	1938.8	2638.16	13396.2	29901.3	4586.23	87.3598	679.208	5.47778	2.34857	32.5261	216.608	0.507972	0.54232	40.6839	32.5746	9.31215	0.377492
6046	fine_01	6046_4	PI 647908	2	30	3	8	12	FALSE	9.2	-0.555556	9.2	35.6277	12045	1821.77	2283.06	14051.7	27480.7	1974.24	86.9742	774.307	4.48369	1.52834	29.5007	252.772	0.35795	0.519337	40.3802	26.4811	15.7761	0.446659
6046	fine_01	6046_5	PI 647908	2	40	3	14	22	FALSE	11.7	-0.555556	11.7	13.6847	29636.8	3763.49	3917.67	26178.2	34892.5	3164.21	81.9693	689.366	7.76464	1.57838	29.3137	202.474	0.709769	0.366747	51.9564	56.8456	14.5199	0.338683
6049	fine_01	6049_1	PI 647900	2	2.5	3	8	11	TRUE	56.7	-0.844797	56.7	5.13105	1004.99	3236.01	3177.65	10377.8	42297.5	2080.96	86.9862	361.748	2.82706	1.19443	11.7399	84.1651	0.589641	0.617989	55.993	38.5921	9.27813	0.123649
6049	fine_01	6049_2	PI 647900	2	10	3	2	3	TRUE	47.8	-0.844797	47.8	6.19764	8036.24	3063.13	3295.37	10379.5	32714.7	2957.33	223.411	339.758	2.03253	1.26652	14.1536	81.2605	0.833545	0.47903	45.0179	53.0651	6.75315	0.128916
6049	fine_01	6049_4	PI 647900	2	30	3	8	12	FALSE	8.8	-0.844797	8.8	37.2551	45688.5	2592.7	2344.82	11509.7	17885	5696.06	82.7646	850.707	6.42157	2.04749	28.9149	188.955	1.15024	0.566956	29.8229	116.567	12.7039	0.472766
6062	fine_04	6062_1	PI 647891	3	2.5	3	6	9	TRUE	21.1	-0.800948	21.1	14.4677	2393.23	4184.32	3830.31	11892.1	38283.9	6422.21	148.663	598.931	1.68725	1.22875	19.0605	115.809	0.751165	0.919473	50.9745	69.9745	9.8747	0.133723
6062	fine_04	6062_2	PI 647891	3	10	3	3	5	TRUE	38.7	-0.800948	38.7	6.64498	9919.89	3474.5	3011.19	1796.91	30106.1	4666.89	354.444	355.233	1.78855	-0.394336	15.3375	86.6079	0.775661	-0.353019	40.0997	73.7059	6.12416	0.0894963
6062	fine_04	6062_3	PI 647891	3	20	3	6	9	TRUE	17	-0.800948	17	7.58238	13934.8	2364.69	2433.15	10353.9	22255.8	8766.08	82.648	347.78	1.79455	0.872036	18.8401	160.54	0.677342	0.410196	32.258	56.637	8.30539	0.111618
6064	fine_05	6064_1	DG001	3	2.5	3	6	9	TRUE	84.9	-0.723204	84.9	7.81024	1174.72	3995.67	2763.66	9094.39	40034.6	3498.35	114.156	434.424	1.55969	0.722463	7.87032	57.9038	0.712952	0.68046	50.9793	64.0429	11.3237	0.0831823
6064	fine_05	6064_2	DG001	3	10	3	2	3	TRUE	26.6	-0.723204	26.6	12.4507	7978.22	3655.78	2886.53	7777.71	22486.3	5417.5	96.7657	603.689	1.98233	1.59648	15.2635	74.5423	2.76148	0.653057	30.0301	94.7044	8.64696	0.159348
6064	fine_05	6064_3	DG001	3	20	3	2	4	FALSE	9.2	-0.723204	9.2	10.0313	9375.45	2261.73	2459.79	51698.2	24385.4	3757.19	117.082	685.642	2.89466	3.68864	22.7204	105.125	0.3576	1.61967	32.1691	43.4406	10.4492	0.123356
6064	fine_05	6064_5	DG001	3	40	3	13	20	FALSE	10.7	-0.723204	10.7	8.57361	50622.6	5349.22	2344.95	9402.96	10003.2	23645.9	142.905	1097.17	4.06607	0.279112	20.2259	623.418	2.08712	0.514017	31.1201	204.646	13.811	0.203919
6073	fine_01	6073_1	PI 647913	2	2.5	3	2	4	TRUE	72.4	-0.233425	72.4	5.91361	1144.6	3888.53	2926.23	13518.4	50521.9	3135.9	126.918	298.496	1.12617	1.05111	8.50568	57.1862	0.857264	0.593449	58.8658	60.0752	8.4781	0.0875778
6073	fine_01	6073_2	PI 647913	2	10	3	6	9	TRUE	89.5	-0.233425	89.5	6.4455	8179.86	2714.67	3141.92	8893.16	30941.7	3355.07	95.2327	342.141	0.954614	0.844687	11.6388	68.5324	0.811336	0.416482	40.5248	58.9905	6.55913	0.0858283
6073	fine_01	6073_3	PI 647913	2	20	3	4	7	TRUE	39.5	-0.233425	39.5	5.38828	11397.6	2841.05	2301.46	9702.9	22425	3742.74	118.923	534.208	1.59092	0.83186	15.7632	112.712	0.881283	0.408297	29.9824	62.5978	9.69938	0.190904
6073	fine_01	6073_4	PI 647913	2	30	3	8	12	FALSE	55.5	-0.233425	55.5	9.08851	29620.2	1844.23	2367.22	8700.32	23377.1	3475.9	68.4061	426.803	1.26166	0.562271	15.9101	117.688	0.505692	0.322231	31.5529	48.0606	12.009	0.116104
6073	fine_01	6073_5	PI 647913	2	40	3	13	20	FALSE	18.6	-0.233425	18.6	6.06096	19622	2600.46	2796.39	9389.84	27935.6	3053.45	71.2356	735.886	1.96878	0.0830061	17.7628	134.075	0.514103	0.32876	36.8807	50.2522	13.5818	0.16803
6075	fine_02	6075_2	PI 647910	2	10	3	6	9	FALSE	14.6	NA	14.6	11.0111	9378	2535.69	2871.29	9003.83	31978.7	6567.16	207.718	167.718	1.77812	0.926003	11.3946	96.6485	0.736423	0.47318	49.5172	66.3963	6.13879	0.0855951
6075	fine_02	6075_3	PI 647910	2	20	3	5	8	TRUE	24	NA	24	4.17234	9392.96	1669.42	2213.58	8958.25	22736.2	2316.88	107.007	196.868	0.735974	0.537467	10.4122	42.5219	0.482082	0.248269	33.8555	37.4617	5.56801	0.0681534
6077	fine_21	6077_1	DG033	3	2.5	3	2	4	FALSE	12.1	-0.586777	12.1	12.5579	2151.36	3623.56	2646.07	52774.7	41483.9	4722.69	73.6554	612.457	8.40946	4.7815	19.8564	130.014	0.389685	1.95558	58.3844	74.0407	9.64661	0.177593
6077	fine_21	6077_4	DG033	3	30	3	8	12	FALSE	5	-0.586777	5	32.167	14824.3	1460.56	2403.91	19762.8	21580.2	3410.1	70.22	860.393	9.36466	3.51846	45.025	283.539	0.478486	0.98179	39.3354	47.2353	19.7381	0.422714
6082	fine_01	6082_1	PI 647897	2	2.5	3	4	7	TRUE	128.3	-0.921278	85	4.10548	818.491	3274.53	3034.1	9624.02	50088.2	2466.32	165.908	277.67	1.11092	0.811676	7.15261	59.6926	0.715086	0.532595	57.5986	42.2965	7.52507	0.0841496
6082	fine_01	6082_3	PI 647897	2	20	3	3	5	TRUE	55.1	-0.921278	55.1	4.92385	9117.77	2576.03	2496.33	11363	28774.2	2582.79	64.1215	531.033	2.50089	1.12371	16.1408	132.002	0.548654	0.418196	41.469	38.4268	8.17667	0.198342
6082	fine_01	6082_4	PI 647897	2	30	3	8	12	FALSE	10.1	-0.921278	10.1	38.689	12360.9	1674.92	2561.06	14004	27109.1	3556.2	72.4611	792.637	3.4291	1.64717	30.1679	280.443	0.38924	0.510371	41.8199	20.3329	14.1103	0.453651
6082	fine_01	6082_5	PI 647897	2	40	3	13	20	FALSE	14.3	-0.921278	14.3	6.68373	49672.7	3236.85	2533.26	7129.15	17655	10245.8	106.589	781.94	4.05945	0.438983	19.6701	424.573	1.32929	0.255978	34.3024	77.324	13.9177	0.355297
6084	fine_01	6084_1	PI 647905	2	2.5	3	4	7	TRUE	30.6	-0.611111	30.6	4.07345	648.135	4312.45	2368.09	10446.2	42104.3	2517.61	36.9284	760.986	7.18889	4.5966	11.7238	181.64	0.466822	0.688986	57.8479	27.108	10.9585	0.495081
6084	fine_01	6084_2	PI 647905	2	10	3	6	9	TRUE	46.2	-0.611111	46.2	10.2256	5888.53	3333.79	3006.86	10978.6	40219.8	3958.78	82.4768	463.096	2.69806	2.1241	15.0087	139.077	0.524991	0.481641	65.9441	45.1975	7.52404	0.261916
6084	fine_01	6084_3	PI 647905	2	20	3	3	5	TRUE	17.7	-0.611111	17.7	4.4872	11631.3	3621.44	2857.92	-370.67	34066.3	3779.06	61.6071	454.81	2.6953	-3.47281	15.0683	102.696	0.936867	-0.757753	56.0875	74.7579	9.70622	0.150187
6084	fine_01	6084_4	PI 647905	2	30	3	8	12	FALSE	11.9	-0.611111	11.9	9.93932	13194	2513.67	2602.66	13130.8	28762.1	2522.26	77.5278	654.792	2.71263	1.14035	23.3071	141.354	0.634706	0.528958	51.4217	47.7613	15.7559	0.345526
6089	fine_07	6089_1	DG022	1	2.5	3	6	9	TRUE	17.8	-0.966292	17.8	10.1186	2898.03	4354.86	2629.01	9851.55	32455.3	5578.67	57.2314	712.813	4.62723	2.48514	15.7406	84.5435	0.751812	1.37397	45.5573	97.878	11.4823	0.244136
6089	fine_07	6089_2	DG022	1	10	3	6	9	FALSE	8.8	-0.966292	8.8	23.3832	11832.8	2808.74	2321.21	12217	19994.2	13391.5	83.8112	553.459	5.67098	3.75345	24.9187	241.301	0.617131	0.910664	28.4736	77.7859	6.04636	0.24724
6089	fine_07	6089_3	DG022	1	20	3	5	8	TRUE	18.1	-0.966292	18.1	20.4811	9029.01	2987.93	2034.71	10758.2	22370.3	4556.17	79.8958	629.128	4.80175	2.75119	20.5391	108.304	0.956467	0.812671	34.8153	78.2647	9.38681	0.193722
6095	fine_11	6095_1	PI 377709	2	2.5	3	2	3	TRUE	89.4	-0.559284	89.4	4.54213	1220.3	3324.25	3146.05	5606.39	44913.4	2530.05	251.843	231.878	1.99307	1.02196	7.30877	47.2937	1.23007	0.598762	61.6692	52.9571	8.33458	0.0896543
6095	fine_11	6095_2	PI 377709	2	10	3	6	9	TRUE	64.9	-0.559284	64.9	7.41056	6768.18	2234.95	3027.05	9208.65	34017.7	2475.68	117.757	215.912	1.28721	1.04363	10.9028	54.7096	0.654808	0.431631	54.0698	41.398	6.55882	0.0652639
6095	fine_11	6095_3	PI 377709	2	20	3	4	7	FALSE	11	-0.559284	11	7.47729	8581.31	3279.33	2387.61	6568.66	24159.5	3350.02	94.2507	413.902	1.56958	1.15119	19.4389	93.9951	0.903888	0.226625	40.9588	69.8321	12.4441	0.135177
6095	fine_11	6095_4	PI 377709	2	30	3	8	12	FALSE	39.4	-0.559284	39.4	6.37378	12595.1	2254.7	2392.29	10079.2	24794.7	3110	122.98	317.699	1.72634	0.789295	15.9312	98.8452	0.73099	0.397836	43.6318	49.9028	14.2072	0.0978586
6095	fine_11	6095_5	PI 377709	2	40	3	13	20	FALSE	10.5	-0.559284	10.5	14.4301	81189.6	10131.9	2119.56	12922	7673.87	14398.4	121.289	455.606	3.17903	0.570088	10.1416	73.3159	5.99385	0.618133	29.2175	435.149	16.6807	0.179397
6098	fine_13	6098_1	PI 576134	2	2.5	3	2	3	TRUE	45.8	-0.853712	45.8	9.28989	2157.55	4009.49	2812.6	18783.4	49713.4	4307.15	68.96	412.381	2.60464	1.56249	12.9416	70.5481	0.621429	1.06843	61.5043	71.5447	13.6126	0.092317
6098	fine_13	6098_2	PI 576134	2	10	3	9	13	TRUE	22.7	-0.853712	22.7	11.1828	10709.6	2009.59	2597.49	8986.32	23161	3130.79	83.893	442.884	3.48287	1.66979	21.6846	93.8102	0.457667	0.811455	32.9723	42.5914	7.33526	0.123791
6098	fine_13	6098_3	PI 576134	2	20	3	4	7	FALSE	11.1	-0.853712	11.1	11.4005	9019.93	3201	2248.8	9082.06	26925.1	4454.66	125.806	625.419	4.08028	1.68461	20.8156	100.172	1.18105	0.619243	37.5021	84.2772	9.34042	0.142121
6098	fine_13	6098_4	PI 576134	2	30	3	8	12	FALSE	6.7	-0.853712	6.7	22.9868	15575.8	7012.95	2327.05	16162.7	27178.4	6350.35	82.7548	847.326	5.9323	2.18354	21.3684	136.096	3.11856	0.995841	40.4006	138.048	18.2025	0.286514
6109	fine_02	6109_1	PI 647911	2	2.5	3	2	4	TRUE	53.5	-0.917757	53.5	6.90945	901.364	5342.16	2687.61	13300.8	45968.2	2682.49	58.4461	564.25	4.78206	1.763	13.0755	110.033	0.808528	0.773084	62.6465	51.5354	10.9421	0.242834
6109	fine_02	6109_2	PI 647911	2	10	3	1	2	TRUE	49.1	-0.917757	49.1	5.24965	4967.39	2499.34	2093.6	8051.91	25179	1836.4	74.5879	296.122	3.77586	1.45448	11.9425	70.975	0.525248	0.692791	39.4959	32.0108	5.92934	0.158427
6109	fine_02	6109_3	PI 647911	2	20	3	4	7	TRUE	17.9	-0.917757	17.9	7.16577	7569.4	3614.59	2545.86	10802.8	28647.5	2594.47	72.0405	492.195	5.07952	1.49576	20.0446	147.726	0.921974	0.736171	46.598	49.5632	10.773	0.351332
6109	fine_02	6109_4	PI 647911	2	30	3	8	12	FALSE	4.4	-0.917757	4.4	94.5051	18104.7	8279.03	2900.89	18703.7	31934	4014.98	135.169	987.905	5.93852	3.02676	25.8779	177.422	3.36424	1.23317	53.4732	97.9784	23.8743	0.369915
6111	fine_04	6111_1	PI 647920	3	2.5	3	2	4	TRUE	26.7	-0.827715	26.7	10.6076	1768.5	4659.59	3264.07	26589.9	44932.2	5047.32	116.04	462.858	2.17571	2.01337	14.5671	72.6474	0.599604	0.964481	58.1353	79.5609	9.33116	0.0943902
6111	fine_04	6111_2	PI 647920	3	10	3	1	2	TRUE	32.2	-0.827715	32.2	6.41649	5374.63	2142.33	2085.71	8763.88	21440	3055.64	80.7462	266.64	2.22533	1.25229	10.3452	59.3192	0.531738	0.821617	30.0478	49.3399	4.41365	0.0884185
6111	fine_04	6111_3	PI 647920	3	20	3	4	7	FALSE	6.1	-0.827715	6.1	6.31733	13135	3268.99	2854	3339.56	27789.3	5162.26	109.028	533.83	3.22013	1.61328	24.1556	144.496	0.878946	0.197832	42.6334	92.974	11.0628	0.313537
6111	fine_04	6111_5	PI 647920	3	40	3	13	20	FALSE	3.8	-0.827715	3.8	20.3066	43365.3	2823.04	2986.16	2836.66	10735.6	41121.6	168.164	616.103	2.00059	-1.89298	17.1175	1506.91	0.474371	0.257602	33.0453	63.3755	17.3471	0.479336
6120	fine_05	6120_1	DG002	3	2.5	3	4	7	TRUE	184	-0.979348	88.1	7.92446	980.023	4080.86	2539.49	9118.34	41703.5	3389.89	207.806	383.52	1.79267	0.768249	6.57021	52.0237	0.8324	0.608673	51.3581	67.2076	9.71456	0.083423
6120	fine_05	6120_2	DG002	3	10	3	1	2	TRUE	50.1	-0.979348	50.1	7.09744	4233.57	2391.94	1864.36	6913.75	20452.1	2758.12	76.2923	419.935	2.09333	0.712828	9.86649	61.5845	0.484144	0.606393	26.1814	44.322	6.33176	0.0865633
6120	fine_05	6120_3	DG002	3	20	3	5	8	FALSE	4.1	-0.979348	4.1	8.99772	7894.44	2190.07	2406.16	8722.01	28286	2834.98	114.972	946.865	2.29392	2.17287	30.3002	112.726	0.573178	-0.14047	40.5365	62.5478	11.7973	0.130947
6120	fine_05	6120_4	DG002	3	30	3	8	12	FALSE	3.8	-0.979348	3.8	81.3793	17019.8	2023.43	1836.63	19587.5	20592.6	2662.3	90.9565	1607.58	3.75043	1.52737	45.095	253.925	0.788349	0.873871	29.714	62.0366	18.7941	0.314649
6120	fine_05	6120_5	DG002	3	40	3	13	20	FALSE	4.7	-0.979348	4.7	10.7713	23795.9	1983.54	1925.19	12339	9310.85	4517.42	135.331	1142.85	2.99608	-0.360584	21.9112	114.478	0.838693	0.781704	27.6695	73.8699	12.9679	0.142069
6122	fine_01	6122_1	PI 647902	2	2.5	3	4	7	TRUE	73.6	-0.574728	73.6	9.11801	993.936	4050.8	3402.02	11165.9	46018.8	5321.8	181.753	271.009	1.70407	1.04306	8.66956	58.4758	2.71627	0.638988	61.2422	103.77	13.1402	0.0744221
6122	fine_01	6122_3	PI 647902	2	20	3	5	8	TRUE	61.4	-0.574728	61.4	5.51876	8494.5	2462.24	2418.81	9627.29	28743.6	2894.08	51.5289	444.413	1.83809	0.966274	13.3292	102.668	0.649114	0.273823	41.5241	50.3529	10.3957	0.113287
6122	fine_01	6122_4	PI 647902	2	30	3	8	12	FALSE	31.3	-0.574728	31.3	6.64971	15229.1	2148.5	2401.25	9983.21	25826.3	2976.42	55.9255	602.563	3.11473	1.19318	17.3503	165.021	0.671444	0.359528	40.7588	44.754	14.6805	0.181796
6122	fine_01	6122_5	PI 647902	2	40	3	13	20	FALSE	51.3	-0.574728	51.3	5.82115	59635.3	3506.08	2271.97	11011.4	19172.1	7736.08	72.1743	485.184	2.71109	0.847886	12.153	145.586	3.88549	0.316022	30.0207	160.211	15.0633	0.213345
6127	fine_20	6127_1	DG020	1	2.5	3	8	11	TRUE	22.8	-0.837719	22.8	13.6459	2957.3	3367.06	2779.66	8507.4	28753.1	3365.53	53.6131	474.978	1.9403	1.47998	17.2075	53.5897	0.758535	1.34459	39.652	60.9398	11.6544	0.109805
6127	fine_20	6127_2	DG020	1	10	3	1	2	TRUE	31.9	-0.837719	31.9	8.88997	6088.44	2611.81	1799.75	8167.5	13395.6	3008.34	61.5008	367.436	4.74436	2.20415	12.3725	64.9412	0.474202	0.839148	23.39	58.8637	3.55775	0.113778
6127	fine_20	6127_3	DG020	1	20	3	6	9	FALSE	17.2	-0.837719	17.2	22.6639	12176.8	3014.89	2574.34	9982.44	21331.5	11760.1	107.985	664.589	4.23018	2.58473	31.8331	261.025	0.884185	0.883041	34.1934	89.4845	7.6033	0.154097
6127	fine_20	6127_4	DG020	1	30	3	8	12	FALSE	3.7	-0.837719	3.7	99.1043	10826.7	1414.26	2491.7	21409.3	20770	632.893	115.954	589.519	3.08035	2.45084	29.9542	93.7622	0.813986	0.786359	35.0549	46.7751	7.65466	0.109207
6127	fine_20	6127_5	DG020	1	40	3	14	21	FALSE	3.9	-0.837719	3.9	19.8042	27307	5970.93	4787.31	34467.7	19638.5	9757.94	156.591	1497.86	4.23228	0.703739	31.7637	116.93	2.34928	0.83988	57.2078	212.509	17.1331	0.239768
6132	fine_14	6132_1	PI 614678	3	2.5	3	4	7	TRUE	124.6	-0.921348	79.9	5.17233	1027.84	3437.52	2840.81	8219.35	40413.1	3593.39	204.706	268.813	0.693537	0.658312	6.45219	46.9379	0.815264	0.45842	51.9601	64.3094	7.44819	0.0386108
6132	fine_14	6132_2	PI 614678	3	10	3	2	3	TRUE	67.1	-0.921348	67.1	6.84783	7396.79	3680.14	2901.23	9462.01	30851.8	4392.87	96.1497	440.545	1.61265	0.925432	12.0686	85.0127	0.922991	0.527256	36.7601	70.123	7.38765	0.0958976
6132	fine_14	6132_3	PI 614678	3	20	3	2	4	TRUE	41	-0.921348	41	9.15439	15822.1	3632.25	2515.51	14196	23115.4	6575.3	95.5198	529.237	1.59215	1.21087	13.9605	118.053	1.51539	0.663891	28.5505	113.463	10.0791	0.0828421
6132	fine_14	6132_4	PI 614678	3	30	3	8	12	FALSE	9.8	-0.921348	9.8	36.4089	14744.1	1191.34	2220.87	15724.2	22639.6	1883.34	74.1276	538.369	1.21734	0.671428	17.806	113.996	0.344445	0.33821	33.3159	25.4246	14.3604	0.0782521
6132	fine_14	6132_5	PI 614678	3	40	3	13	20	FALSE	7.3	-0.921348	7.3	12.0198	16642.1	1375.13	2053.1	8920.21	10727.9	2326.78	123.205	677.282	0.94562	-0.926802	12.4123	87.6032	0.379066	0.498275	32.5715	29.2037	16.4384	0.0979226
6141	fine_01	6141_1	PI 647893	2	2.5	3	8	11	TRUE	130.1	-0.885473	76.4	5.59052	1041.47	2914.26	2989.01	9762.62	48435.2	2263.71	93.831	267.02	2.39395	1.01707	9.61438	66.9624	1.17518	0.561075	55.6776	43.952	10.3241	0.115035
6141	fine_01	6141_2	PI 647893	2	10	3	2	4	TRUE	106.5	-0.885473	106.5	6.67379	6889.75	3205.94	3559.35	5849.97	33718.7	3017.9	99.5207	344.815	2.63955	0.830635	11.6476	74.1864	1.60936	0.483769	51.7294	56.6524	8.2551	0.124379
6141	fine_01	6141_3	PI 647893	2	20	3	3	5	TRUE	17.3	-0.885473	17.3	7.35112	8134.06	3231.22	3415.09	5615.82	36366.6	3394.49	80.6612	630.367	3.57672	-2.65587	22.9346	136.308	0.935581	0.0479442	55.4439	59.6007	14.3783	0.199087
6141	fine_01	6141_5	PI 647893	2	40	3	13	20	FALSE	15.7	-0.885473	15.7	11.0963	101882	3449.43	1813.33	8694.92	6695.1	8571.06	59.1241	538.157	2.62888	0.735298	12.612	93.8159	3.09378	0.624807	20.6732	187.786	12.5873	0.21537
6145	fine_08	6145_2	DG021	3	10	3	8	12	FALSE	6.9	NA	6.9	21.801	12351.2	2208.49	2547.53	13361.7	17978.7	5058.19	273.54	484.2	6.40482	2.91964	32.5471	195.938	0.80583	1.06902	24.8549	57.575	8.86078	0.241959
6145	fine_08	6145_3	DG021	3	20	3	6	9	FALSE	3	NA	3	14.9269	15883.7	4451.2	2878.69	15556.1	24342	87598	172.536	556.593	6.18077	2.60999	53.3154	1504.57	0.89605	1.13528	32.4186	79.0027	12.6393	0.336798
6151	fine_01	6151_1	PI 647895	2	2.5	3	4	7	TRUE	68.8	-0.748547	68.8	5.19999	922.495	3811.62	3559.82	9066.28	46695.6	3190.08	146.446	288.953	1.61495	0.993559	10.0974	63.715	0.9217	0.527289	70.283	51.7592	7.70129	0.0917232
6151	fine_01	6151_2	PI 647895	2	10	3	8	12	TRUE	81.6	-0.748547	81.6	7.55647	9113.2	2255.11	2621.76	6571.78	26624.5	3963.81	207.395	279.022	1.62627	1.13111	12.9035	93.0621	0.666205	0.331374	37.9101	41.019	4.90256	0.103257
6151	fine_01	6151_5	PI 647895	2	40	3	13	20	FALSE	7	-0.748547	7	9.97438	14897.9	2356.27	2739.96	9092.35	12464.6	9882.24	83.3025	687.05	2.48924	-0.398725	20.2793	412.966	0.451498	0.139765	42.3193	37.3151	13.7417	0.335481
6153	fine_19	6153_1	PI 647923	3	2.5	3	4	7	TRUE	20.4	-0.941176	20.4	9.84974	1405.74	4326.94	2542.26	9268.56	38665.7	5867.45	62.6668	617.114	2.1419	1.93024	17.9542	90.3168	0.733533	1.0539	49.3505	91.1043	6.6206	0.110858
6153	fine_19	6153_2	PI 647923	3	10	3	9	13	TRUE	26.7	-0.941176	26.7	6.75595	8571.29	2291.12	2557.06	6474.87	27644.6	3846.17	69.1161	306.858	2.9167	1.92038	17.3617	68.4007	0.377311	0.515632	38.0232	49.5576	3.72819	0.0639941
6153	fine_19	6153_3	PI 647923	3	20	3	5	8	FALSE	2.1	-0.941176	2.1	6.58706	8209.36	2411.83	2655.47	-3631.73	30539.4	12642.9	135.162	433.067	3.88613	2.60552	30.126	363.487	0.658936	-0.882316	43.8788	72.4471	5.42924	0.0247301
6153	fine_19	6153_4	PI 647923	3	30	3	8	12	FALSE	1.2	-0.941176	1.2	254.586	13113.9	2329.64	2096.41	47923.9	14280.7	24887.5	128.964	859.599	2.61981	1.06762	43.8228	792.533	0.764529	0.523817	21.9056	50.8006	9.7749	0.129288
6155	fine_03	6155_1	PI 509022	3	2.5	3	7	10	TRUE	33.2	-0.945783	33.2	5.59935	1263.33	3958.53	2622.92	7303.41	37207.4	4904.62	63.3512	497.022	1.7946	1.06555	10.6542	68.2838	0.939715	0.867701	52.531	74.0864	7.68982	0.106143
6155	fine_03	6155_2	PI 509022	3	10	3	8	12	TRUE	19.4	-0.945783	19.4	10.0151	6805.29	2008.51	2467.03	8331.47	24215.2	11408.7	94.2264	382.99	2.23797	1.27406	13.5429	283.726	0.44996	0.500756	32.7802	42.8247	4.48353	0.0993285
6155	fine_03	6155_4	PI 509022	3	30	3	8	12	FALSE	1.8	-0.945783	1.8	39.4268	44749.8	1945.18	2387.83	26177.4	26529.4	8613.8	104.15	499.875	2.97562	1.75816	20.2671	451.051	0.812344	0.925375	37.3792	68.8094	6.80776	0.432024
6155	fine_03	6155_5	PI 509022	3	40	3	13	20	FALSE	1.3	-0.945783	1.3	45.135	12955.6	1590.64	3287.76	3841.26	11050.8	5341.83	303.226	1012.8	3.23227	-0.774333	29.7756	168.123	0.916521	1.79113	36.2977	49.1156	15.9514	0.225395
6158	fine_05	6158_1	DG004	3	2.5	3	8	11	TRUE	57.2	-0.763986	57.2	5.44696	993.541	3402.55	2975.85	9073.03	43021.8	3410.2	525.971	340.714	1.40914	0.903413	8.71366	59.642	0.58807	0.549903	65.8189	54.5532	6.46654	0.0694384
6158	fine_05	6158_2	DG004	3	10	3	9	13	TRUE	45.8	-0.763986	45.8	6.49897	7471.6	2640.06	2407.47	9521.71	25153.6	3133.7	73.3697	565.089	1.52091	0.706377	13.5713	88.268	0.325379	0.331059	34.6169	31.6145	6.31598	0.12415
6158	fine_05	6158_3	DG004	3	20	3	6	9	TRUE	35.1	-0.763986	35.1	12.7331	6638.33	3837.58	2319.79	8844.92	24533.2	4217.39	70.8449	801.679	3.51953	0.743635	17.7161	152.332	0.508041	0.391096	33.3388	46.9229	7.62975	0.181516
6158	fine_05	6158_4	DG004	3	30	3	8	12	FALSE	13.5	-0.763986	13.5	11.8964	18908	1736.99	1775.79	6679.51	13681.5	5287.52	319.143	880.92	3.7687	1.14255	24.611	255.314	0.407276	0.296118	22.1379	31.1483	10.868	0.241961
6158	fine_05	6158_5	DG004	3	40	3	13	20	FALSE	5.9	-0.763986	5.9	14.2492	4524.04	4979.06	2768.64	10582.5	14971.1	5707.22	123.302	1291.2	4.09882	-0.732424	24.7888	182.457	0.563267	0.0594433	39.1886	63.5966	19.9182	0.411094
6159	fine_01	6159_1	PI 647899	2	2.5	3	6	9	TRUE	94.2	-0.504246	94.2	7.61615	914.146	4415.94	3076.97	11539.1	47042.5	5199.7	291.979	470.195	1.89439	1.23707	11.1895	126.993	1.13588	0.910877	65.8481	56.973	9.56149	0.153745
6159	fine_01	6159_2	PI 647899	2	10	3	8	12	TRUE	50.5	-0.504246	50.5	5.27003	9215.73	1692.37	2590.27	7876.45	24902.1	2417.87	309.492	499.445	1.90773	1.17628	16.5623	112.835	0.510494	0.485252	30.2255	27.2004	7.03523	0.160694
6159	fine_01	6159_3	PI 647899	2	20	3	7	10	TRUE	40.2	-0.504246	40.2	5.65444	8262.5	1558.13	2526.43	9868.25	28584	2029.59	131.873	292.255	1.18528	0.534212	13.7344	74.497	0.316012	0.313834	31.6302	20.712	8.11126	0.0828818
6159	fine_01	6159_4	PI 647899	2	30	3	8	12	FALSE	46.7	-0.504246	46.7	10.5953	37935.8	1934.77	2324.08	8296.51	23911.3	3511.43	131.791	315.124	0.903971	0.466785	13.7461	88.8038	0.444799	0.236531	26.4151	45.2926	10.4189	0.0770912
6159	fine_01	6159_5	PI 647899	2	40	3	13	20	FALSE	45.6	-0.504246	45.6	4.43659	46408	2541.4	2550.89	7298.5	23254.2	3622.36	173.424	394.754	1.90718	0.779373	14.6417	96.101	0.647219	0.416792	27.5381	65.7439	11.3664	0.107384
6163	fine_02	6163_1	PI 647906	2	2.5	3	6	9	TRUE	93.4	-0.43576	93.4	7.88001	816.09	4230.14	3016.04	10095.3	51000.3	4149.9	199.911	443.432	1.95937	1.36744	10.7143	110.335	0.791336	0.861193	65.9744	55.5474	7.98157	0.0959621
6163	fine_02	6163_2	PI 647906	2	10	3	9	13	TRUE	113	-0.43576	89	4.67135	9925.43	2466.8	2674.83	7250.42	32355.3	3074.15	153.356	351.915	1.38388	0.935711	12.6307	75.4639	0.588466	0.446642	43.9272	46.8485	5.29568	0.0780675
6163	fine_02	6163_3	PI 647906	2	20	3	6	9	TRUE	77.7	-0.43576	77.7	5.99401	8920.79	3670.95	2633.49	11631.4	30624.2	3190.56	83.2868	423.072	2.00451	0.803773	14.9267	130.19	0.447475	0.407368	39.6908	43.6157	7.55006	0.111229
6163	fine_02	6163_4	PI 647906	2	30	3	8	12	FALSE	52.7	-0.43576	52.7	4.14112	18774.6	1501.28	2244.65	8301.88	23470.2	2304.04	85.4675	372.082	1.11579	0.612738	15.0655	92.3782	0.325354	0.311034	35.8518	30.1986	10.4832	0.0454084
6163	fine_02	6163_5	PI 647906	2	40	3	13	20	FALSE	19.1	-0.43576	19.1	7.72247	47334.4	2786.03	2053.86	5727.85	21602.9	5699.39	166.676	593.873	2.08869	0.554519	15.6639	87.9496	1.19489	0.461842	31.9487	126.255	12.1895	0.134681
6168	fine_06	6168_1	DG009	3	2.5	3	7	10	TRUE	52.4	-0.94084	52.4	3.67087	562.809	3114.15	2536.81	6753.54	48226.1	2913.03	58.3384	288.899	1.63993	0.644655	8.48017	79.3102	0.309406	0.325947	63.2972	28.324	5.37359	0.0760262
6168	fine_06	6168_3	DG009	3	20	3	6	9	FALSE	1.9	-0.94084	1.9	114.352	8616.61	7028.53	4978.77	41456.2	63673.6	27046	232.136	1635.06	6.51466	0.332939	41.7536	596.032	1.54004	0.989366	82.9202	92.4102	22.8652	0.537334
6168	fine_06	6168_4	DG009	3	30	3	8	12	FALSE	3.1	-0.94084	3.1	36.8189	30461	3255.35	3449.07	26175.3	34475.1	2846.93	117.572	1691.09	8.59448	2.63842	55.5581	457.075	0.488441	0.882341	51.161	35.8228	26.3055	0.752987
6174	fine_08	6174_1	DG023	3	2.5	3	5	8	TRUE	16.9	NA	16.9	8.94145	1400.76	3557.11	2534.33	10114.8	37893.3	4725.85	40.4676	406.349	2.4593	1.61273	13.2951	66.2367	0.673662	1.14516	54.8363	77.2556	8.71481	0.133319
6174	fine_08	6174_2	DG023	3	10	3	7	10	TRUE	16.4	NA	16.4	8.72848	7470.84	2762.58	2479.82	10999.2	24114.5	3697.76	97.5382	381.303	5.9405	1.76426	16.1862	87.2825	0.498455	0.612084	32.272	54.772	5.75604	0.0977426
6179	fine_01	6179_1	PI 647898	2	2.5	3	7	10	TRUE	148.3	-0.895482	71.1	5.55537	712.038	4028.15	2902.25	10825.2	44256.5	3344.88	181.889	453.344	1.2935	1.23287	9.83411	71.7269	1.18238	0.988309	56.2835	60.8719	10.871	0.153979
6179	fine_01	6179_2	PI 647898	2	10	3	7	10	TRUE	33.9	-0.895482	33.9	3.96732	8242.35	2025.79	2991.37	5050.84	32361.8	2223.93	163.227	388.887	1.25758	1.4239	14.0807	74.6679	0.586929	0.525378	46.9094	36.1122	6.0074	0.127942
6179	fine_01	6179_3	PI 647898	2	20	3	6	9	TRUE	35.3	-0.895482	35.3	9.96162	11622.7	2538.25	2892.75	10396.4	32805.5	2972.98	73.709	442.566	1.50683	1.33666	15.9869	99.226	0.576393	0.457983	46.7676	45.1433	7.4991	0.111413
6179	fine_01	6179_4	PI 647898	2	30	3	8	12	FALSE	15.5	-0.895482	15.5	22.4126	15374.9	1906.58	2277.28	10838.6	25153.3	1996.01	224.445	728.668	2.79201	1.125	22.8613	139.498	0.475543	0.513125	40.5637	32.4837	12.4216	0.206073
6179	fine_01	6179_5	PI 647898	2	40	3	13	20	FALSE	10.4	-0.895482	10.4	9.02007	32068.7	1678.8	2728.01	9804.94	9729.35	2726.48	140.799	896.65	3.1904	0.764612	24.2951	137.038	0.760009	0.625618	33.5499	45.6535	17.7924	0.233922
6188	fine_07	6188_1	DG014	1	2.5	3	4	7	FALSE	11.4	-0.77193	11.4	9.76201	2736.46	3743.42	3154.21	11448.4	42440.8	13351.5	103.426	346.689	1.78766	1.13965	15.9157	225.152	0.930664	0.641177	54.5022	78.3379	8.9323	0.0436209
6188	fine_07	6188_3	DG014	1	20	3	6	9	FALSE	1.8	-0.77193	1.8	79.9104	23161.4	1989.38	4783.99	26388.1	33019.3	5956.77	167.178	641.589	3.03485	0.558303	29.2461	141.041	0.747422	0.538583	48.1606	61.3506	12.3397	0.579397
6188	fine_07	6188_4	DG014	1	30	3	9	13	FALSE	2.6	-0.77193	2.6	17.9748	10174.4	1710.09	2288.4	-3055.02	25180.3	959.325	67.8085	248.06	1.66283	1.81933	16.5537	73.2892	0.418518	0.255343	37.7246	31.9701	8.37353	0.0972243
6188	fine_07	6188_5	DG014	1	40	3	13	20	FALSE	3.2	-0.77193	3.2	29.9871	20126.4	4230.63	1874.42	-3813.8	9697.12	6309.07	125.81	503.265	2.37357	0.495081	14.6632	86.6469	0.854874	0.949904	31.89	118.534	7.58829	0.0611161
6199	fine_02	6199_1	PI 509021	2	2.5	3	1	1	TRUE	88.1	-0.965948	88.1	5.51086	1392.06	3839.6	1988.93	8083.23	37317.4	2689.98	260.937	308.446	3.02798	1.06171	8.00317	61.0707	1.28945	0.551503	45.8321	54.8971	9.90703	0.108195
6199	fine_02	6199_2	PI 509021	2	10	3	1	2	TRUE	47.6	-0.965948	47.6	5.69792	7900.8	2523.54	1896.61	8004.71	20868.7	2361.18	64.3823	302.24	3.80048	1.15201	11.1314	69.0888	0.664798	0.717698	27.6945	47.6403	6.05856	0.10039
6199	fine_02	6199_3	PI 509021	2	20	3	7	10	FALSE	11.4	-0.965948	11.4	6.71945	14760.6	5421.25	2545.5	8037.08	25303.7	4526.48	70.3273	1029.51	8.64376	1.6259	33.9499	260.589	0.996644	0.594516	36.9166	84.4972	10.8051	0.270878
6199	fine_02	6199_4	PI 509021	2	30	3	8	12	FALSE	3	-0.965948	3	37.5179	51293.6	4496.46	3973.46	26991.9	38574	4709.86	115.164	2866.44	19.0639	7.67544	85.671	830.84	1.55913	1.62588	62.8969	103.69	30.5622	1.57814
6213	fine_01	6213_1	PI 647912	2	2.5	3	8	11	TRUE	63.6	-0.960692	63.6	5.93025	1394.23	3731.15	2756.84	11733.6	39287.5	2709.3	45.0179	419.416	2.72258	1.00997	11.9939	76.4631	0.848258	0.815222	50.1746	49.2731	11.5936	0.131109
6213	fine_01	6213_2	PI 647912	2	10	3	6	9	TRUE	136.4	-0.960692	85.9	7.99932	16012.2	4508.76	2765.74	9983.51	28841.4	5887.51	88.2705	338.515	2.49454	1.17343	12.0443	77.0642	2.09549	0.602455	37.7639	124.342	8.88751	0.124804
6213	fine_01	6213_3	PI 647912	2	20	3	5	8	FALSE	7.5	-0.960692	7.5	7.55312	16063.4	1925.83	2443.76	9906.57	24824.3	2931.52	97.5639	603.58	1.80905	2.3844	29.0817	109.346	0.886855	0.202811	39.5275	58.0123	9.57704	0.361076
6213	fine_01	6213_4	PI 647912	2	30	3	8	12	FALSE	2.5	-0.960692	2.5	34.5159	61373.9	1424.65	2169.56	23085	21661.1	638.969	69.5381	582.748	1.8215	1.34557	27.6959	160.494	0.565054	0.495123	37.2545	43.6205	9.43024	0.512689
6218	fine_07	6218_1	DG019	1	2.5	3	3	5	FALSE	6	NA	6	17.7886	4329.65	3319.68	2999.78	-14791	41619.8	4326.53	61.3237	558.746	2.44847	-12.5785	24.4734	57.2181	0.952861	-0.335087	54.1411	72.7398	8.45108	0.109713
6218	fine_07	6218_2	DG019	1	10	3	6	9	FALSE	5	NA	5	38.2356	13450	4160.1	2661.34	15104	38657.2	12426.3	58.4005	821.093	8.5518	1.48387	18.3883	142.861	1.34035	1.02121	53.606	163.696	6.80627	0.187664
6222	fine_01	6222_1	PI 647914	2	2.5	3	3	5	FALSE	12.1	-0.46281	12.1	9.5784	3899.65	4040.61	2844.28	-8718.16	38162.3	3064.95	33.8617	1253.17	4.24959	-2.52264	19.0541	179.58	1.34725	-0.310028	52.1929	52.2668	12.9656	0.47409
6222	fine_01	6222_2	PI 647914	2	10	3	8	12	TRUE	31	-0.46281	31	7.72823	11727.9	2178.61	2227.75	7654.09	25007	3076.41	141.112	666.668	4.2811	2.15639	18.9271	141.181	1.00214	0.677547	33.0901	52.4474	8.2185	0.335241
6222	fine_01	6222_3	PI 647914	2	20	3	6	9	FALSE	1.6	-0.46281	1.6	63.4242	15226.3	3985.94	5892	43512.1	70042.3	12775	271.211	844.93	3.58022	0.36426	36.616	278.917	1.42059	1.16594	94.5596	80.0919	19.9406	0.324154
6222	fine_01	6222_4	PI 647914	2	30	3	8	12	FALSE	6.5	-0.46281	6.5	53.8378	18613.3	1392.18	2204.1	15633.6	26351	4612.09	148.936	475.362	2.81098	2.0022	23.5537	273.462	0.48908	0.683419	41.5112	25.5573	10.5716	0.225376
6225	fine_01	6225_1	PI 508735	2	2.5	3	3	6	TRUE	68.3	-0.818448	68.3	7.4935	1314.51	4750.63	3406.57	10495	49213.8	3127.65	100.861	537.488	1.65417	0.286831	11.8429	95.2762	1.14819	1.28855	59.7347	58.1726	9.44522	0.123155
6225	fine_01	6225_2	PI 508735	2	10	3	9	13	TRUE	24.6	-0.818448	24.6	6.27095	23859.9	3063.5	2268.78	5764.36	21849.1	4364.43	397.673	440.566	2.2679	1.95144	18.1484	108.528	1.41851	0.762757	26.3763	80.3617	7.31529	0.221217
6225	fine_01	6225_3	PI 508735	2	20	3	5	8	FALSE	1	-0.818448	1	13.5312	12965.7	7508.72	6726.61	33113.2	97617.2	3976.35	322.283	1296.28	4.0422	7.10017	47.3459	254.749	2.04704	-1.49428	122.59	147.057	22.7084	0.525464
6225	fine_01	6225_5	PI 508735	2	40	3	13	20	FALSE	2.4	-0.818448	2.4	15.7469	7869.85	2956.87	3382.66	5146.86	13957.3	24811.4	230.074	855.296	1.7089	-3.40598	28.7009	811.226	0.96864	0.829137	39.1394	53.4738	18.826	0.374171
